# Supplementary material for: Clarifying the influence of core amino acid hydrophobicity, secondary structure propensity, and molecular volume on amyloid-β 16–22 self-assembly
Source: Royal Society of Chemistry journal article supplement (doi:10.1039/c0mb00210k), 2010-12-07

# Clarifying the Influence of Core Amino Acid Hydrophobicity, Secondary Structure Propensity, and Molecular Volume on Amyloid- $\beta$ 16–22 Self- Assembly<sup>†</sup>

F. Timur Senguen<sup>‡</sup>, Todd M. Doran<sup>‡</sup>, Elizabeth A. Anderson<sup>1</sup>, and Bradley L. Nilsson<sup>‡\*</sup>

<sup>‡</sup>Department of Chemistry, University of Rochester, Rochester, NY, 14627-0216;  
Email: [nilsson@chem.rochester.edu](mailto:nilsson@chem.rochester.edu); Fax: +1 (585) 276-0205; Tel: +1 (585) 276-3053

## ELECTRONIC SUPPORTING INFORMATION

Contents:

|                                                                                                         |    |
|---------------------------------------------------------------------------------------------------------|----|
| <b>Figure S1.</b> Reverse sedimentation assay of fibrils derived from all A $\beta$ (16–22) variants... | 3  |
| <b>Figure S2.</b> HPLC trace (215 nm) of A $\beta$ (16–22) Val 19.....                                  | 4  |
| <b>Figure S3.</b> HPLC trace (215 nm) of A $\beta$ (16–22) Val 20.....                                  | 4  |
| <b>Figure S4.</b> HPLC trace (215 nm) of A $\beta$ (16–22) Val 19,20.....                               | 4  |
| <b>Figure S5.</b> HPLC trace (215 nm) of A $\beta$ (16–22) Leu 19.....                                  | 5  |
| <b>Figure S6.</b> HPLC trace (215 nm) of A $\beta$ (16–22) Leu 20.....                                  | 5  |
| <b>Figure S7.</b> HPLC trace (215 nm) of A $\beta$ (16–22) Leu 19,20.....                               | 5  |
| <b>Figure S8.</b> HPLC trace (215 nm) of A $\beta$ (16–22) Ile 19.....                                  | 6  |
| <b>Figure S9.</b> HPLC trace (215 nm) of A $\beta$ (16–22) Ile 20.....                                  | 6  |
| <b>Figure S10.</b> HPLC trace (215 nm) of A $\beta$ (16–22) Ile 19,20.....                              | 6  |
| <b>Figure S11.</b> HPLC trace (215 nm) of A $\beta$ (16–22) Hfl 19.....                                 | 7  |
| <b>Figure S12.</b> HPLC trace (215 nm) of A $\beta$ (16–22) Hfl 20.....                                 | 7  |
| <b>Figure S13.</b> HPLC trace (215 nm) of A $\beta$ (16–22) Hfl 19,20.....                              | 7  |
| <b>Table S1.</b> Analytical HPLC conditions for peptides 1–12.....                                      | 8  |
| <b>Figure S14.</b> HPLC co-injection of A $\beta$ (16–22) variants.....                                 | 9  |
| <b>Table S2.</b> HPLC co-injection results.....                                                         | 9  |
| <b>Figure S15.</b> MALDI mass spectrum of A $\beta$ (16–22) Val 19.....                                 | 10 |
| <b>Figure S16.</b> MALDI mass spectrum of A $\beta$ (16–22) Val 20.....                                 | 10 |
| <b>Figure S17.</b> MALDI mass spectrum of A $\beta$ (16–22) Val 19,20.....                              | 11 |
| <b>Figure S18.</b> ESI mass spectrum of A $\beta$ (16–22) Leu 19.....                                   | 11 |
| <b>Figure S19.</b> ESI mass spectrum of A $\beta$ (16–22) Leu 20.....                                   | 11 |
| <b>Figure S20.</b> ESI mass spectrum of A $\beta$ (16–22) Leu 19,20.....                                | 12 |
| <b>Figure S21.</b> MALDI mass spectrum of A $\beta$ (16–22) Ile 19.....                                 | 12 |
| <b>Figure S22.</b> MALDI mass spectrum of A $\beta$ (16–22) Ile 20.....                                 | 13 |
| <b>Figure S23.</b> MALDI mass spectrum of A $\beta$ (16–22) Ile 19,20.....                              | 13 |
| <b>Figure S24.</b> ESI mass spectrum of A $\beta$ (16–22) Hfl 19.....                                   | 14 |

|                                                                                                                   |    |
|-------------------------------------------------------------------------------------------------------------------|----|
| <b>Figure S25.</b> MALDI mass spectrum of A $\beta$ (16–22) Hfl 20.....                                           | 14 |
| <b>Figure S26.</b> MALDI mass spectrum of A $\beta$ (16–22) Hfl 19,20.....                                        | 15 |
| <b>Figure S27.</b> MALDI mass spectrum of A $\beta$ (16–22) Val 19 ([1- <sup>13</sup> C] Leu 17, Phe 20).....     | 15 |
| <b>Figure S28.</b> MALDI mass spectrum of A $\beta$ (16–22) Val 20 ([1- <sup>13</sup> C] Leu 17, Val 20).....     | 16 |
| <b>Figure S29.</b> MALDI mass spectrum of A $\beta$ (16–22) Val 19,20 ([1- <sup>13</sup> C] Leu 17, Val 20). 16   |    |
| <b>Figure S30.</b> MALDI mass spectrum of A $\beta$ (16–22) Leu 19 ([1- <sup>13</sup> C] Leu 17, Phe 20). ....    | 17 |
| <b>Figure S31.</b> MALDI mass spectrum of A $\beta$ (16–22) Leu 20 ([1- <sup>13</sup> C] Leu 17, Leu 20).....     | 17 |
| <b>Figure S32.</b> MALDI mass spectrum of A $\beta$ (16–22) Leu 19,20 ([1- <sup>13</sup> C] Leu 17, Leu 20).18    |    |
| <b>Figure S33.</b> MALDI mass spectrum of A $\beta$ (16–22) Ile 19 ([1- <sup>13</sup> C] Leu 17, Phe 20). ....    | 18 |
| <b>Figure S34.</b> MALDI mass spectrum of A $\beta$ (16–22) Ile 20 ([1- <sup>13</sup> C] Lys 16, Ala 21). ....    | 19 |
| <b>Figure S35.</b> MALDI mass spectrum of A $\beta$ (16–22) Ile 19,20 ([1- <sup>13</sup> C] Lys 16, Ala 21)... 19 |    |
| <b>Figure S36.</b> MALDI mass spectrum of A $\beta$ (16–22) Hfl 19 ([1- <sup>13</sup> C] Leu 17, Phe 20).....     | 20 |
| <b>Figure S37.</b> MALDI mass spectrum of A $\beta$ (16–22) Hfl 20 ([1- <sup>13</sup> C] Lys 16, Ala 21). ....    | 20 |
| <b>Figure S38.</b> MALDI mass spectrum of A $\beta$ (16–22) Hfl 19,20 ([1- <sup>13</sup> C] Lys 16, Ala 21).. 21  |    |
| <b>Figure S39.</b> ESI mass spectrum of A $\beta$ (16–22) Ile 19 ([1- <sup>13</sup> C] Leu 17, Ala 21). ....      | 21 |
| <b>Figure S40.</b> ESI mass spectrum of A $\beta$ (16–22) Ile 19,20 ([1- <sup>13</sup> C] Leu 17, Ala 21). ....   | 21 |
| <b>Table S3.</b> Calculated and observed <i>m/z</i> for peptides <b>1–27</b> . ....                               | 22 |
| <b>Figure S41.</b> HPLC calibration curve of A $\beta$ (16–22) Val 19.....                                        | 23 |
| <b>Figure S42.</b> HPLC calibration curve of A $\beta$ (16–22) Val 19,20.....                                     | 23 |
| <b>Figure S43.</b> HPLC calibration curve of A $\beta$ (16–22) Leu 19.....                                        | 24 |
| <b>Figure S44.</b> HPLC calibration curve of A $\beta$ (16–22) Leu 19,20.....                                     | 24 |
| <b>Figure S45.</b> HPLC calibration curve of A $\beta$ (16–22) Ile 19.....                                        | 25 |
| <b>Figure S46.</b> HPLC calibration curve of A $\beta$ (16–22) Ile 19,20.....                                     | 25 |
| <b>Figure S47.</b> HPLC calibration curve of A $\beta$ (16–22) Hfl 19.....                                        | 26 |
| <b>Figure S48.</b> HPLC calibration curve of A $\beta$ (16–22) Hfl 19,20.....                                     | 26 |
| <b>Figure S49.</b> Electron diffraction image of A $\beta$ (16–22) Val 19 fibrils.....                            | 27 |
| <b>Figure S50.</b> Electron diffraction image of A $\beta$ (16–22) Val 20 fibrils.....                            | 27 |
| <b>Figure S51.</b> Electron diffraction image of A $\beta$ (16–22) Leu 19 fibrils.....                            | 28 |
| <b>Figure S52.</b> Electron diffraction image of A $\beta$ (16–22) Leu 20 fibrils.....                            | 28 |
| <b>Figure S53.</b> Electron diffraction image of A $\beta$ (16–22) Leu 19,20 fibrils.....                         | 29 |
| <b>Figure S54.</b> Electron diffraction image of A $\beta$ (16–22) Ile 19 fibrils.....                            | 29 |
| <b>Figure S55.</b> Electron diffraction image of A $\beta$ (16–22) Ile 20 fibrils.....                            | 30 |
| <b>Figure S56.</b> Electron diffraction image of A $\beta$ (16–22) Ile 19,20 fibrils.....                         | 30 |
| <b>Figure S57.</b> Electron diffraction image of A $\beta$ (16–22) Hfl 19 fibrils.....                            | 31 |
| <b>Figure S58.</b> Electron diffraction image of A $\beta$ (16–22) Hfl 20 fibrils.....                            | 31 |
| <b>Figure S59.</b> Electron diffraction image of A $\beta$ (16–22) Hfl 19,20 fibrils.....                         | 32 |
| <b>Table S4.</b> Observed amide I infrared bands of peptides <b>1–27</b> . ....                                   | 33 |
| <b>Figure S60.</b> Supplementary IE-IR spectra.....                                                               | 33 |

**Figure S1.** Reverse sedimentation assay of fibrils derived from all  $A\beta(16-22)$  variants.

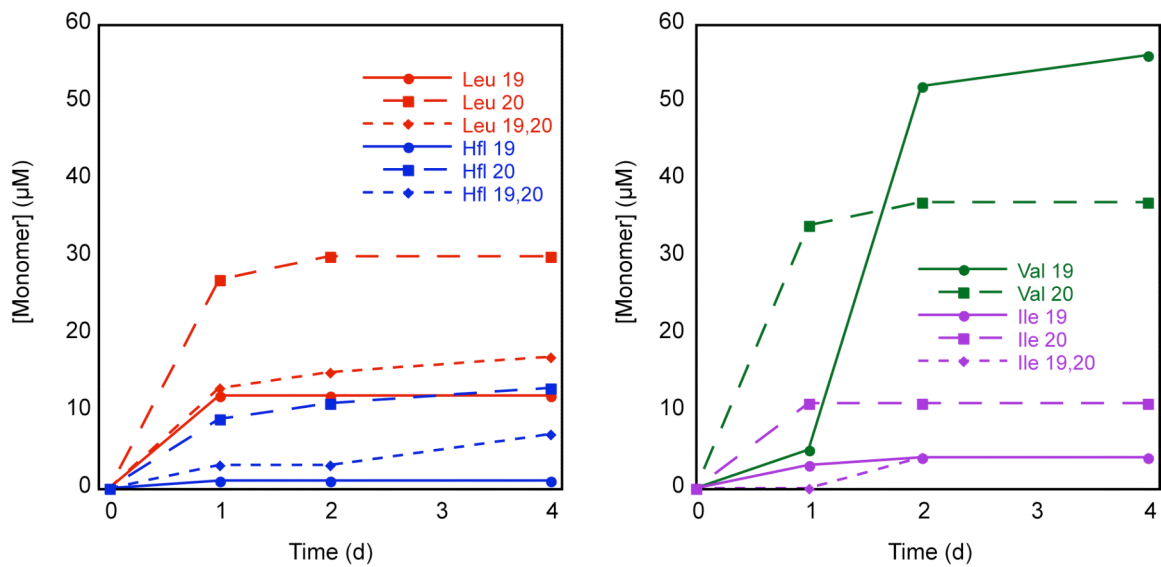

**Figure S2.** HPLC trace (215 nm) of A $\beta$ (16–22) Val 19.

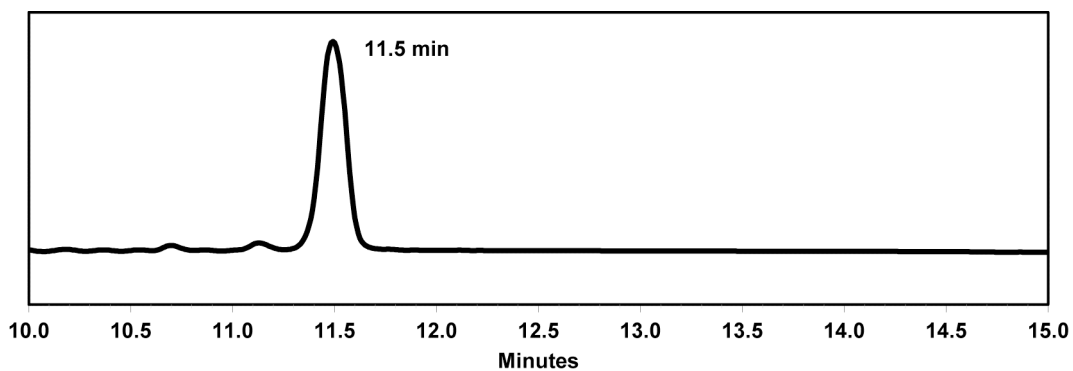

**Figure S3.** HPLC trace (215 nm) of A $\beta$ (16–22) Val 20.

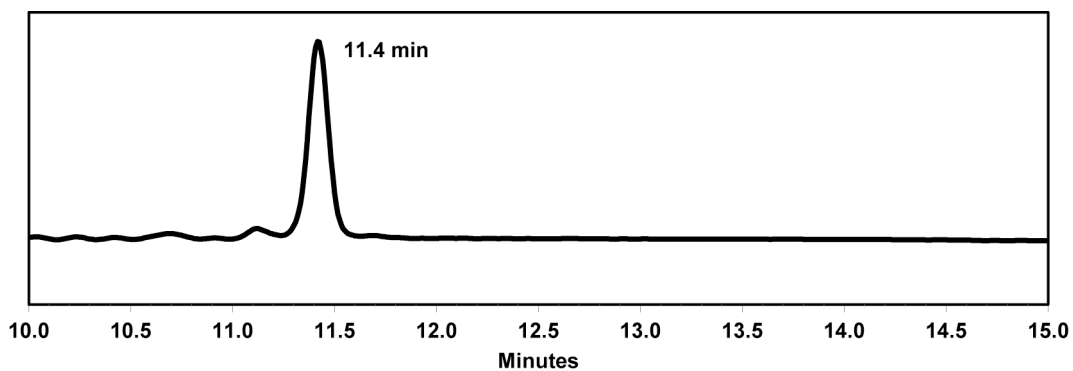

**Figure S4.** HPLC trace (215 nm) of A $\beta$ (16–22) Val 19,20.

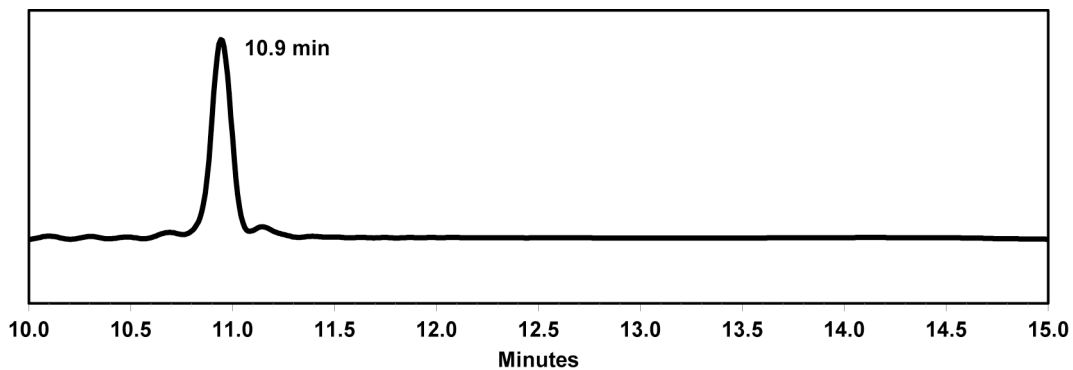

**Figure S5.** HPLC trace (215 nm) of A $\beta$ (16–22) Leu 19.

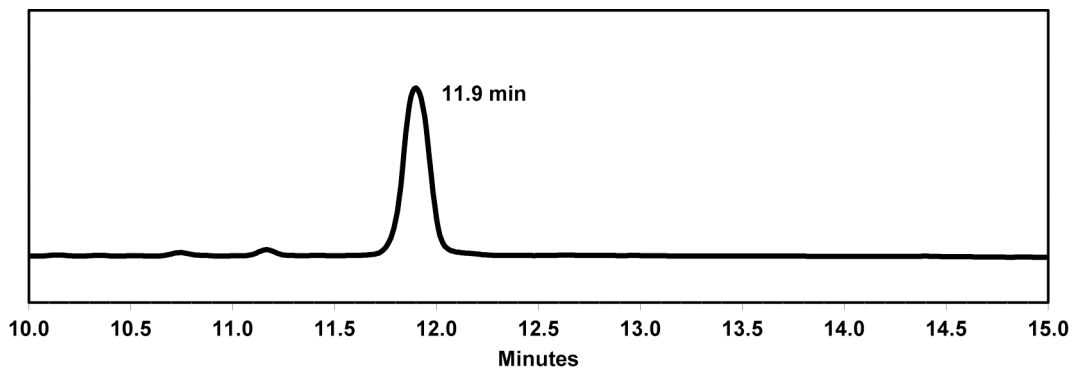

**Figure S6.** HPLC trace (215 nm) of A $\beta$ (16–22) Leu 20.

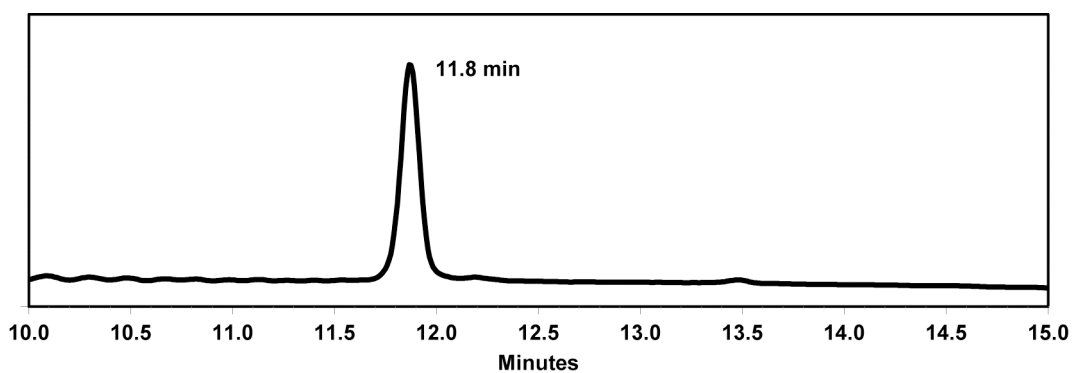

**Figure S7.** HPLC trace (215 nm) of A $\beta$ (16–22) Leu 19,20.

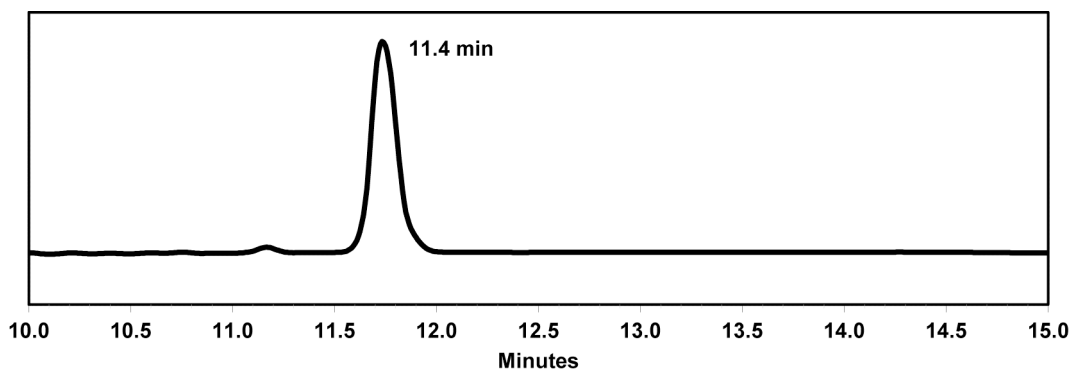

**Figure S8.** HPLC trace (215 nm) of A $\beta$ (16–22) Ile 19.

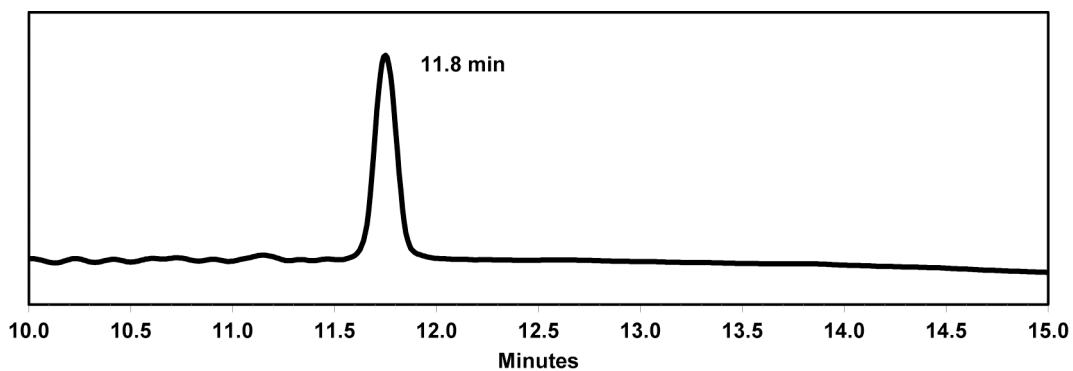

**Figure S9.** HPLC trace (215 nm) of A $\beta$ (16–22) Ile 20.

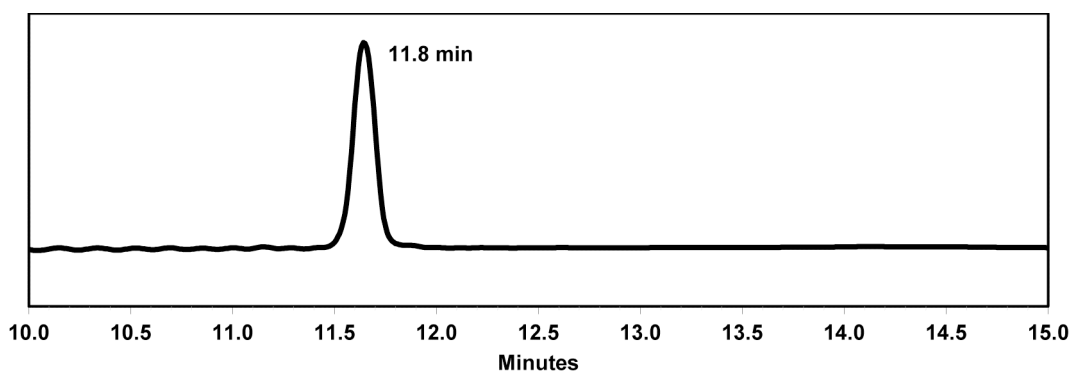

**Figure S10.** HPLC trace (215 nm) of A $\beta$ (16–22) Ile 19,20.

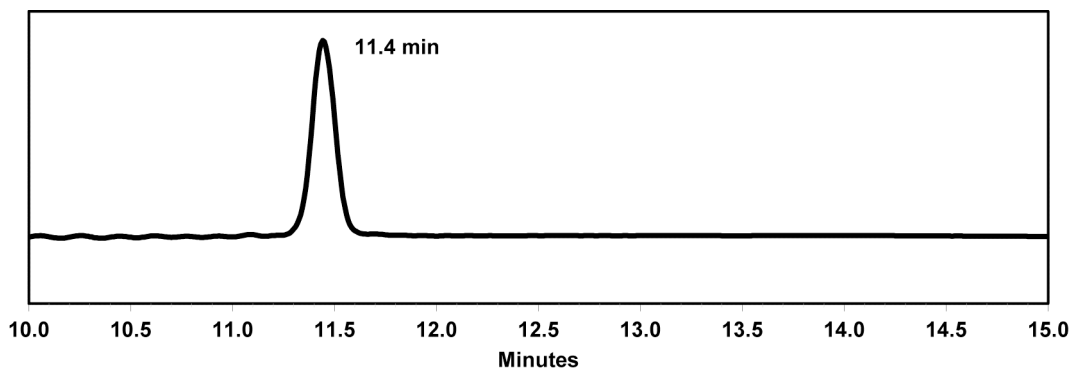

**Figure S11.** HPLC trace (215 nm) of A $\beta$ (16–22) Hfl 19.

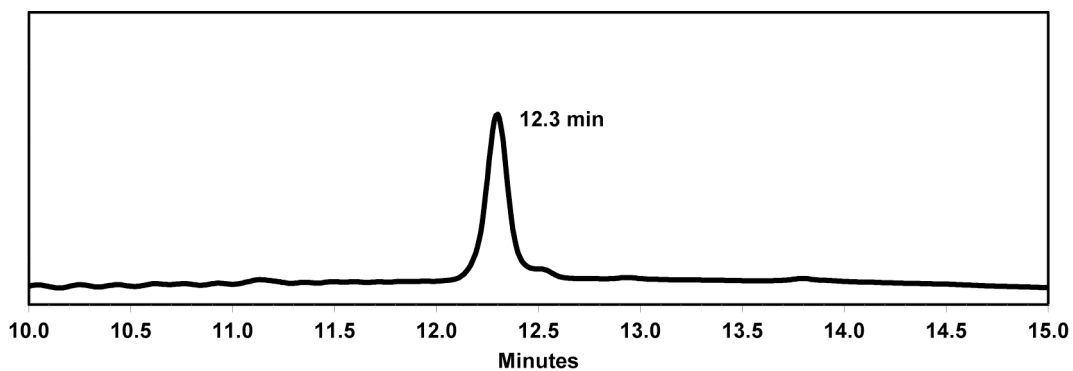

**Figure S12.** HPLC trace (215 nm) of A $\beta$ (16–22) Hfl 20.

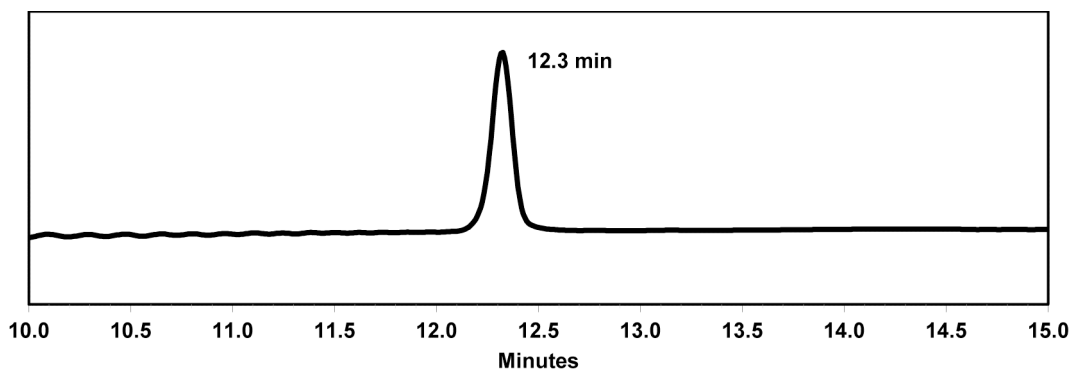

**Figure S13.** HPLC trace (215 nm) of A $\beta$ (16–22) Hfl 19,20.

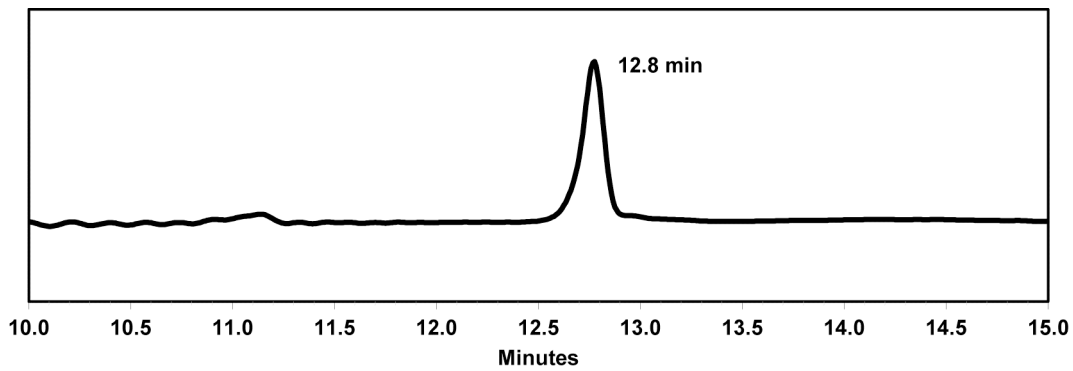

**Table S1.** Analytical HPLC conditions for peptides **1–12**.

| <b>Peptide</b> | <b>Sequence</b>                    | <b>Retention time (min)</b> | <b>Gradient</b> (solution A: water/0.5% TFA; solution B: acetonitrile/0.5% TFA)                                        |
|----------------|------------------------------------|-----------------------------|------------------------------------------------------------------------------------------------------------------------|
| 1              | Ac-KLVVFAE-NH <sub>2</sub>         | 11.5                        | Isocratic 5% <b>B</b> over 5 minutes, increase 5-95% <b>B</b> over 10 minutes, maintain at 95% <b>B</b> over 5 minutes |
| 2              | Ac-KLVFVAE-NH <sub>2</sub>         | 11.4                        | Isocratic 5% <b>B</b> over 5 minutes, increase 5-95% <b>B</b> over 10 minutes, maintain at 95% <b>B</b> over 5 minutes |
| 3              | Ac-KLVVVAE-NH <sub>2</sub>         | 10.9                        | Isocratic 5% <b>B</b> over 5 minutes, increase 5-95% <b>B</b> over 10 minutes, maintain at 95% <b>B</b> over 5 minutes |
| 4              | Ac-KLVLF AE-NH <sub>2</sub>        | 11.9                        | Isocratic 5% <b>B</b> over 5 minutes, increase 5-95% <b>B</b> over 10 minutes, maintain at 95% <b>B</b> over 5 minutes |
| 5              | Ac-KLVFLAE-NH <sub>2</sub>         | 11.8                        | Isocratic 5% <b>B</b> over 5 minutes, increase 5-95% <b>B</b> over 10 minutes, maintain at 95% <b>B</b> over 5 minutes |
| 6              | Ac-KLVLLAE-NH <sub>2</sub>         | 11.7                        | Isocratic 5% <b>B</b> over 5 minutes, increase 5-95% <b>B</b> over 10 minutes, maintain at 95% <b>B</b> over 5 minutes |
| 7              | Ac-KLVIFAE-NH <sub>2</sub>         | 11.8                        | Isocratic 5% <b>B</b> over 5 minutes, increase 5-95% <b>B</b> over 10 minutes, maintain at 95% <b>B</b> over 5 minutes |
| 8              | Ac-KLVFIAE-NH <sub>2</sub>         | 11.8                        | Isocratic 5% <b>B</b> over 5 minutes, increase 5-95% <b>B</b> over 10 minutes, maintain at 95% <b>B</b> over 5 minutes |
| 9              | Ac-KLVIIAE-NH <sub>2</sub>         | 11.4                        | Isocratic 5% <b>B</b> over 5 minutes, increase 5-95% <b>B</b> over 10 minutes, maintain at 95% <b>B</b> over 5 minutes |
| 10             | Ac-KLV(Hfl)FAE-NH <sub>2</sub>     | 12.3                        | Isocratic 5% <b>B</b> over 5 minutes, increase 5-95% <b>B</b> over 10 minutes, maintain at 95% <b>B</b> over 5 minutes |
| 11             | Ac-KLVF(Hfl)AE-NH <sub>2</sub>     | 12.3                        | Isocratic 5% <b>B</b> over 5 minutes, increase 5-95% <b>B</b> over 10 minutes, maintain at 95% <b>B</b> over 5 minutes |
| 12             | Ac-KLV(Hfl)(Hfl)AE-NH <sub>2</sub> | 12.8                        | Isocratic 5% <b>B</b> over 5 minutes, increase 5-95% <b>B</b> over 10 minutes, maintain at 95% <b>B</b> over 5 minutes |



**Figure S14.** HPLC co-injection of A $\beta$ (16–22) variants.

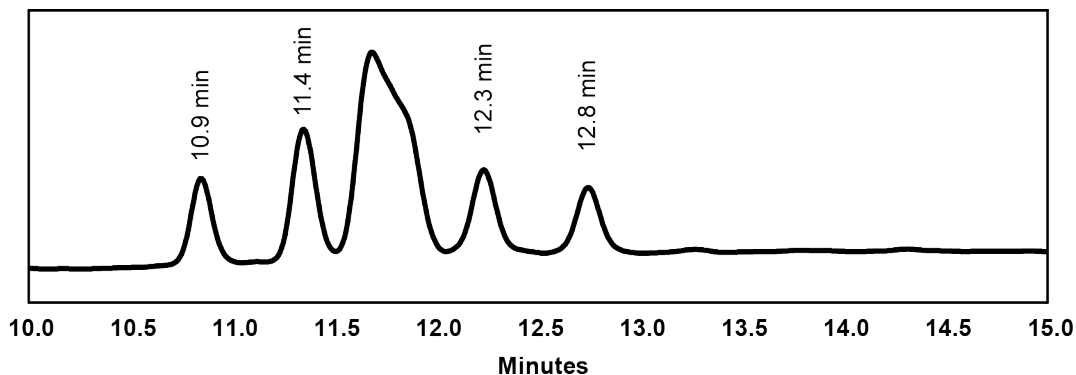

**Table S2.** HPLC co-injection results.

| Peak # | Retention time | Peptide Identity by MS        |
|--------|----------------|-------------------------------|
| 1      | 10.9 min       | Val 19,20                     |
| 2      | 11.4 min       | Val 20, Ile 19,20             |
| 3      | 11.5-12.0 min  | Leu 20, Ile 20, Leu 19,20, WT |
| 4      | 12.3 min       | Hfl 19                        |
| 5      | 12.8 min       | Hfl 19,20                     |

**Figure S15.** MALDI mass spectrum of  $A\beta(16-22)$  Val 19.

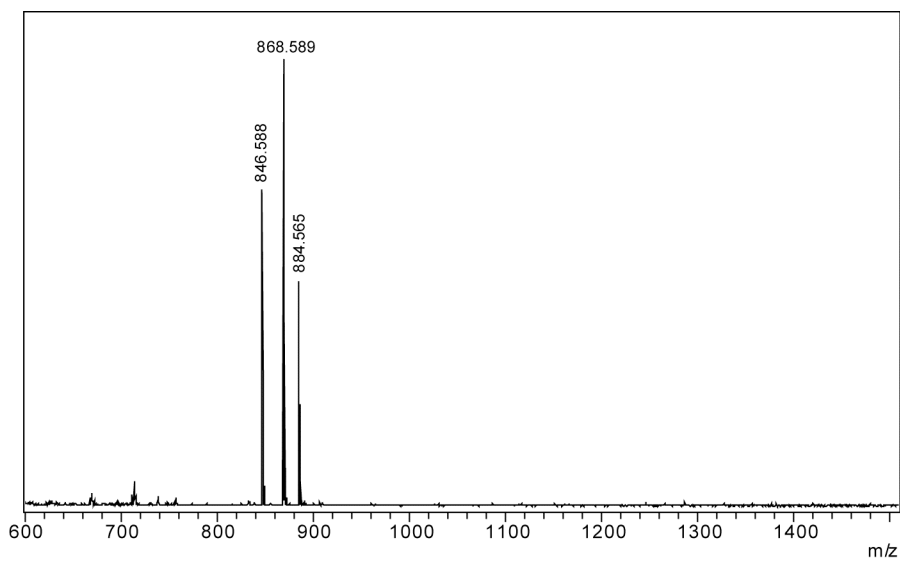

**Figure S16.** MALDI mass spectrum of  $A\beta(16-22)$  Val 20.

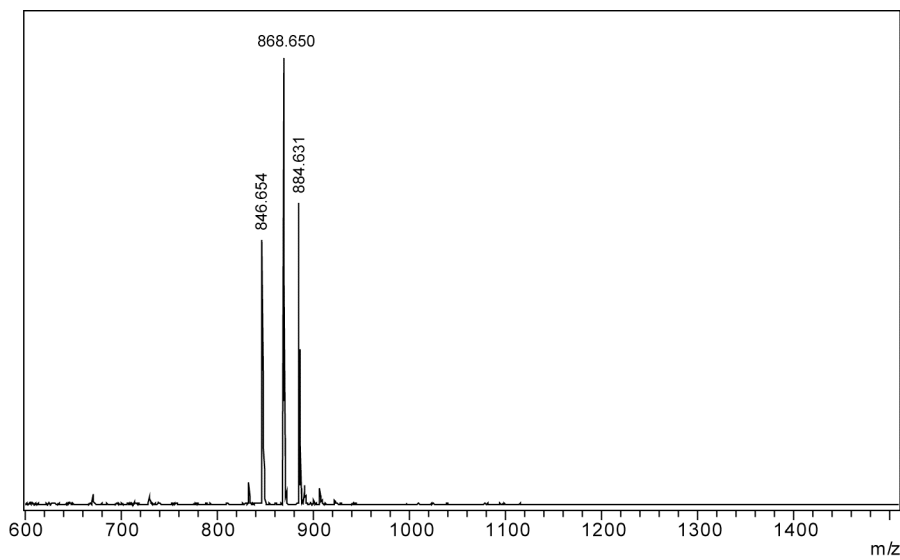

**Figure S17.** MALDI mass spectrum of A $\beta$ (16–22) Val 19,20.

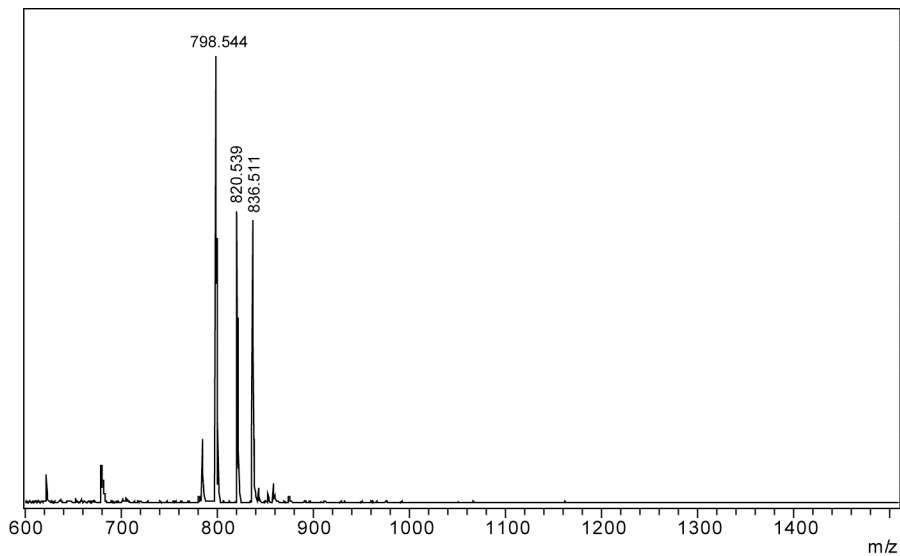

**Figure S18.** ESI mass spectrum of A $\beta$ (16–22) Leu 19.

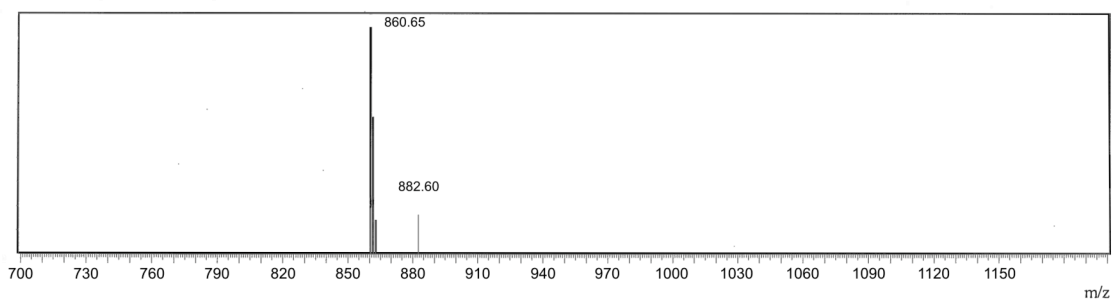

**Figure S19.** ESI mass spectrum of A $\beta$ (16–22) Leu 20.

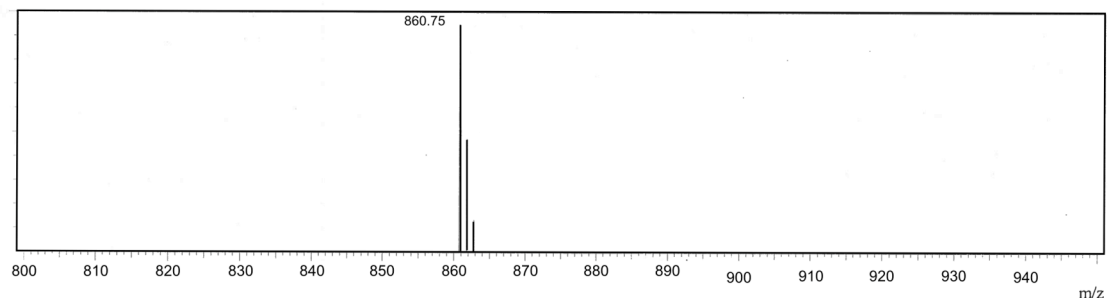

**Figure S20.** ESI mass spectrum of A $\beta$ (16–22) Leu 19,20.

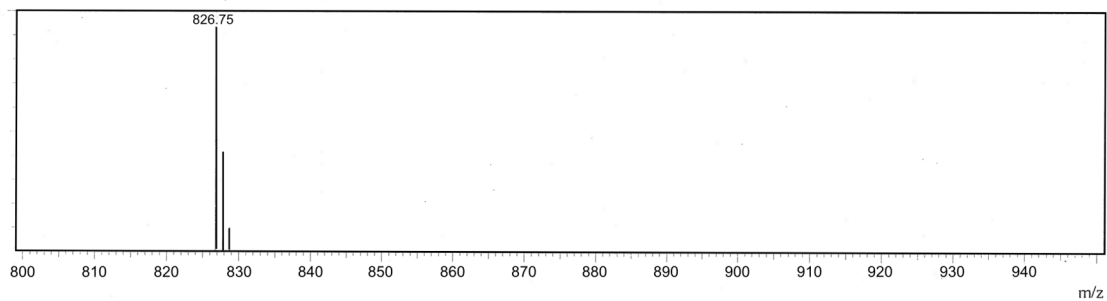

**Figure S21.** MALDI mass spectrum of A $\beta$ (16–22) Ile 19.

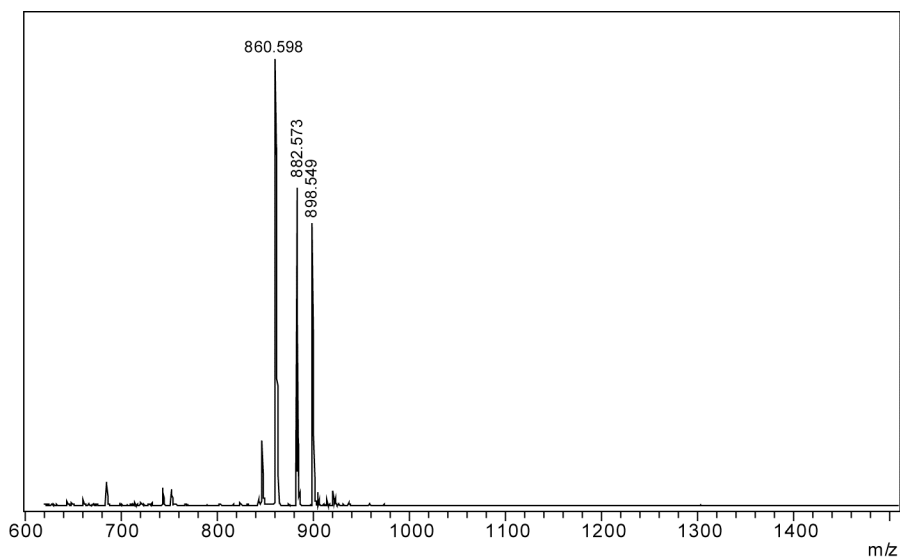

**Figure S22.** MALDI mass spectrum of  $A\beta(16-22)$  Ile 20.

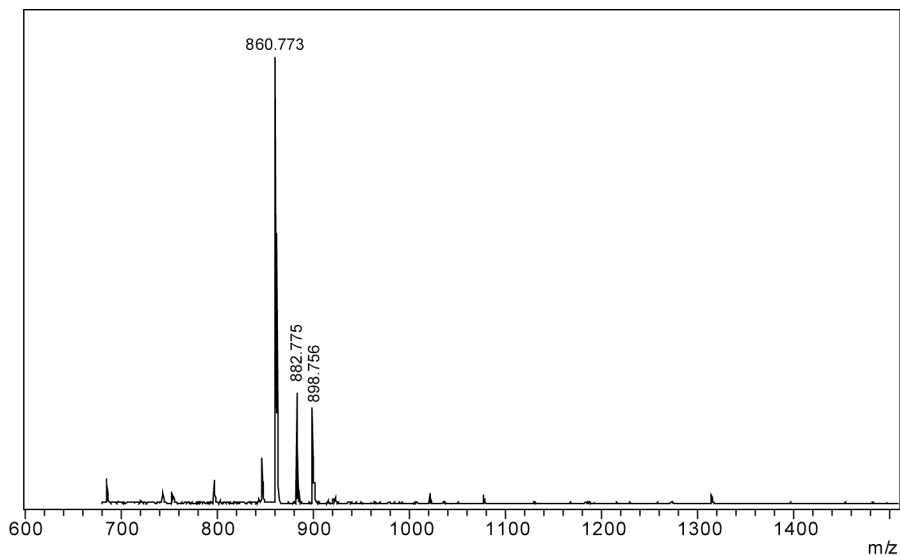

**Figure S23.** MALDI mass spectrum of  $A\beta(16-22)$  Ile 19,20.

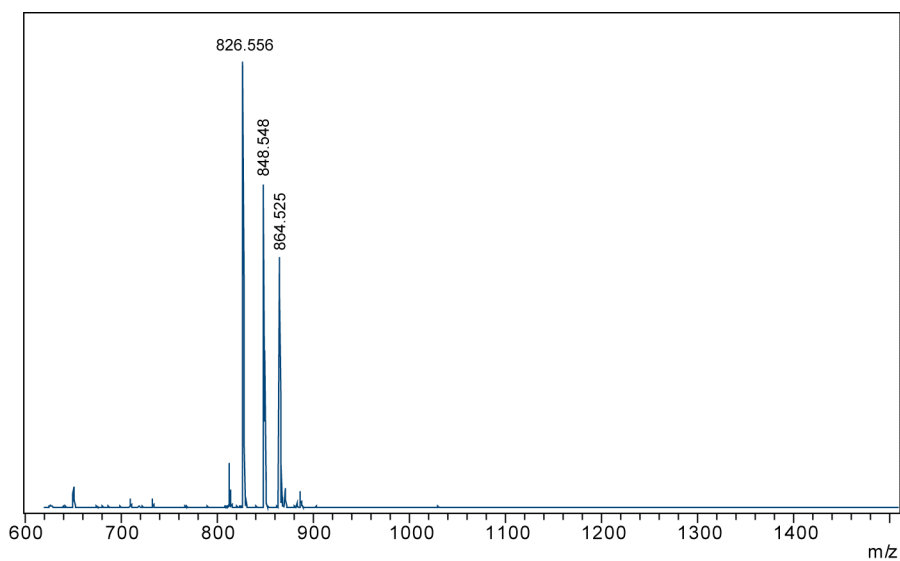

**Figure S24.** ESI mass spectrum of A $\beta$ (16–22) Hfl 19.

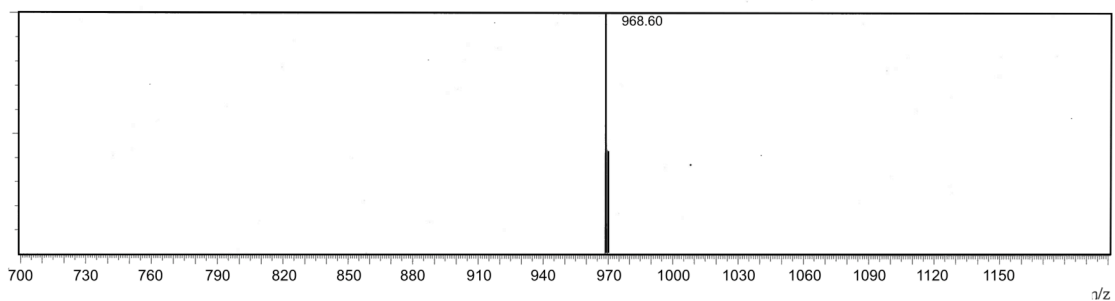

**Figure S25.** MALDI mass spectrum of A $\beta$ (16–22) Hfl 20.

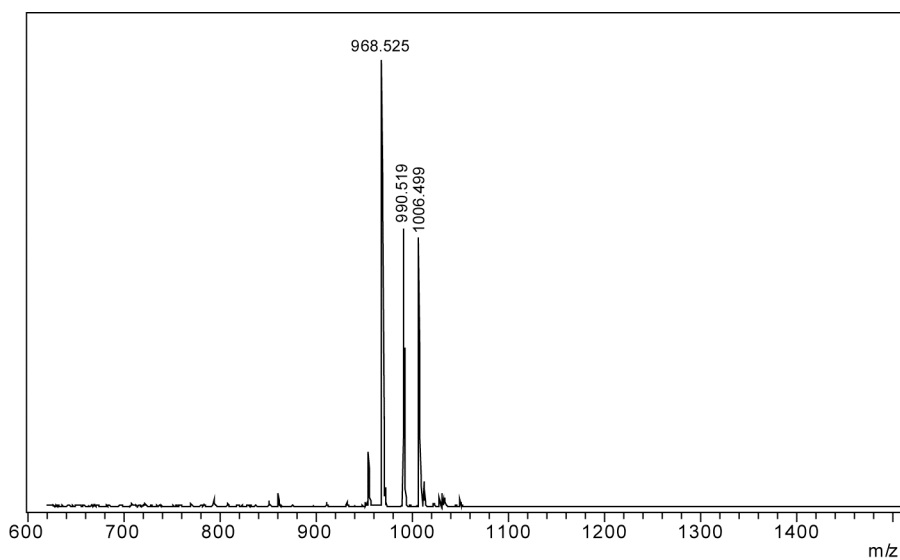

**Figure S26.** MALDI mass spectrum of  $A\beta(16-22)$  Hfl 19,20.

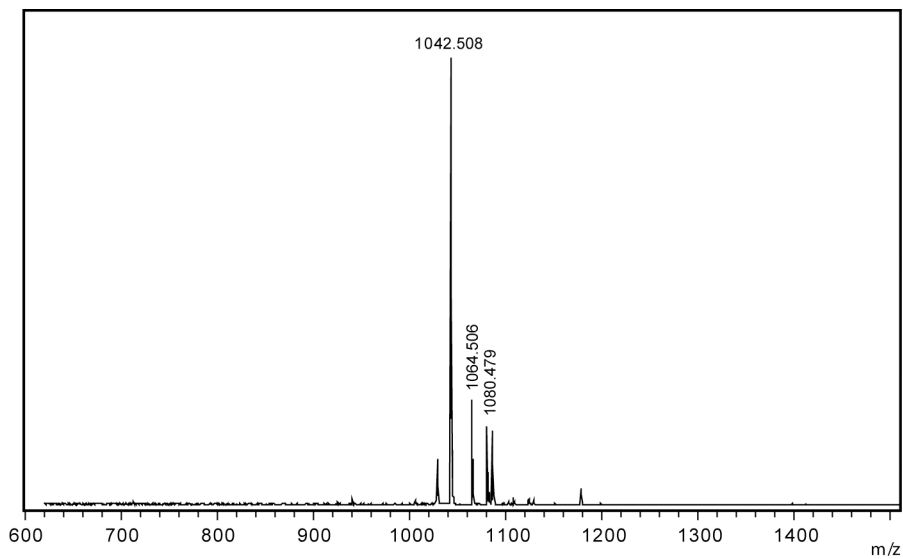

**Figure S27.** MALDI mass spectrum of  $A\beta(16-22)$  Val 19 ([1- $^{13}$ C] Leu 17, Phe 20).

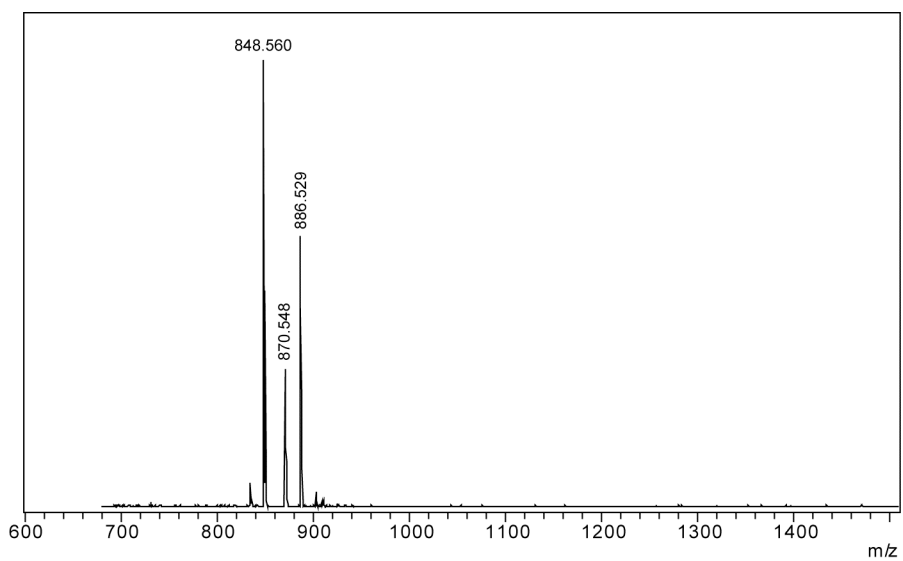

**Figure S28.** MALDI mass spectrum of  $A\beta(16-22)$  Val 20 ( $[1-^{13}C]$  Leu 17, Val 20).

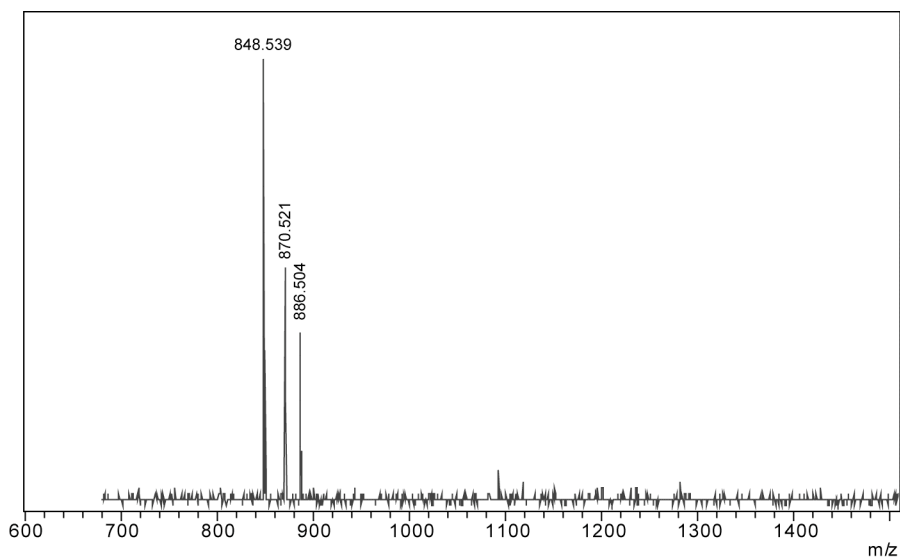

**Figure S29.** MALDI mass spectrum of  $A\beta(16-22)$  Val 19,20 ( $[1-^{13}C]$  Leu 17, Val 20).

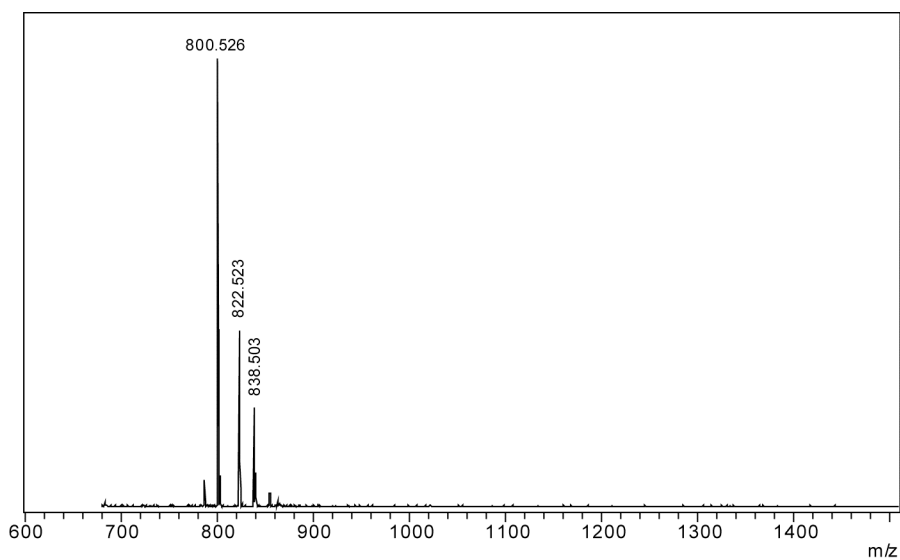



**Figure S30.** MALDI mass spectrum of  $A\beta(16-22)$  Leu 19 ( $[1-^{13}\text{C}]$  Leu 17, Phe 20).

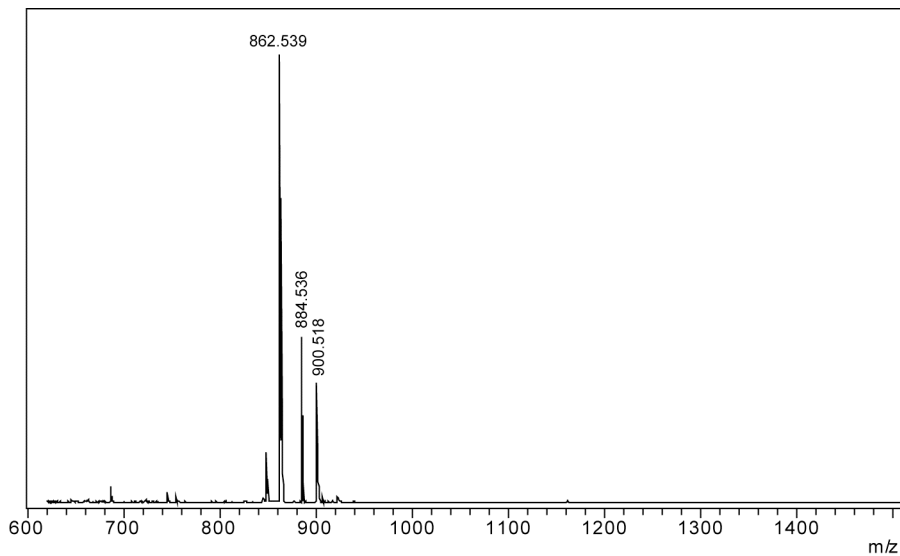

**Figure S31.** MALDI mass spectrum of  $A\beta(16-22)$  Leu 20 ( $[1-^{13}\text{C}]$  Leu 17, Leu 20).

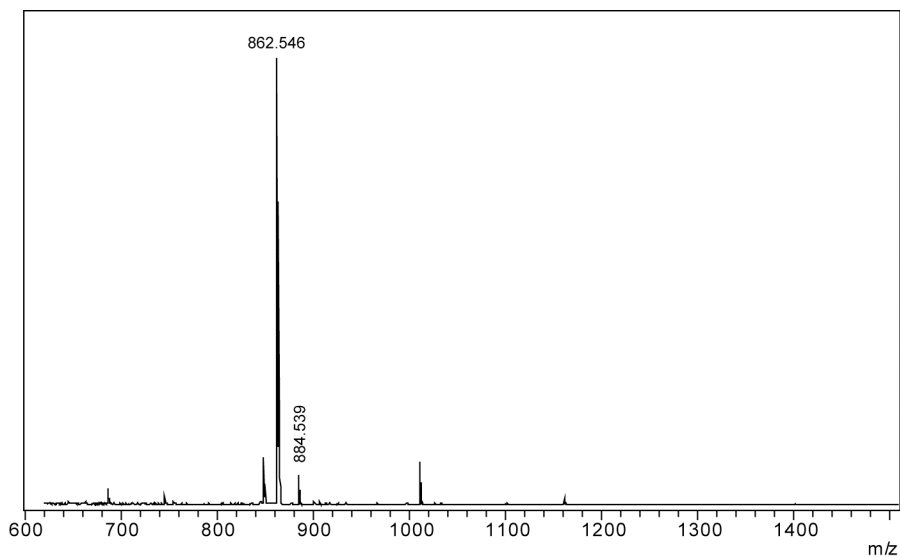

**Figure S32.** MALDI mass spectrum of  $A\beta(16-22)$  Leu 19,20 ( $[1-^{13}C]$  Leu 17, Leu 20).

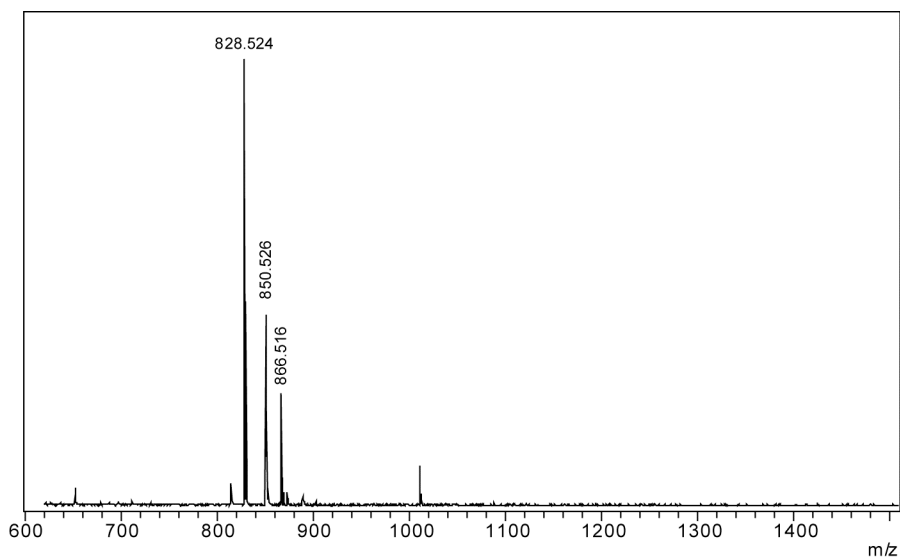

**Figure S33.** MALDI mass spectrum of  $A\beta(16-22)$  Ile 19 ( $[1-^{13}C]$  Leu 17, Phe 20).

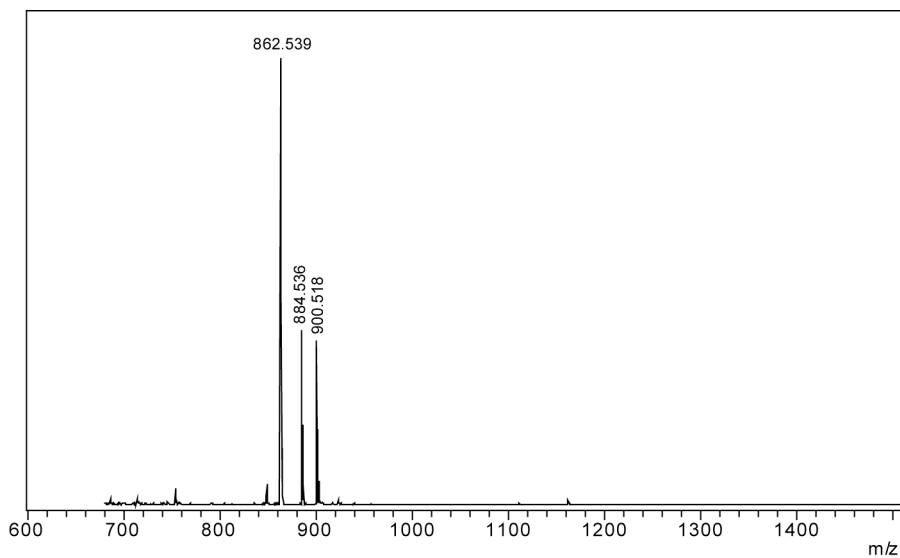

**Figure S34.** MALDI mass spectrum of  $A\beta(16-22)$  Ile 20 ( $[1-^{13}\text{C}]$  Lys 16, Ala 21).

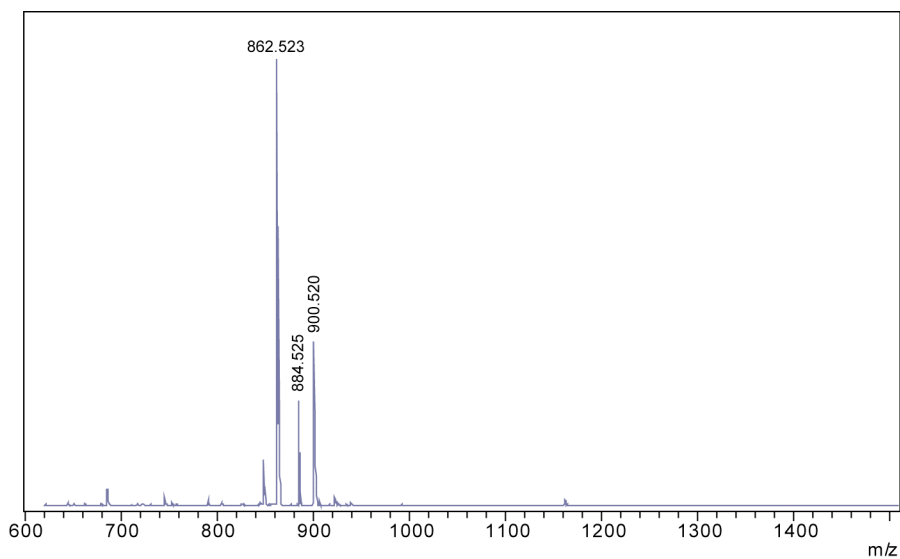

**Figure S35.** MALDI mass spectrum of  $A\beta(16-22)$  Ile 19,20 ( $[1-^{13}\text{C}]$  Lys 16, Ala 21).

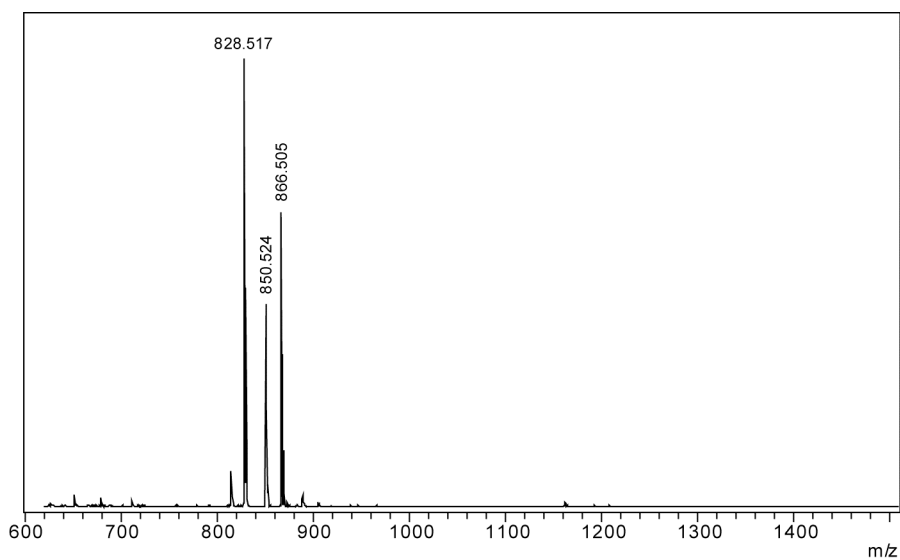

**Figure S36.** MALDI mass spectrum of  $A\beta(16-22)$  Hfl 19 ( $[1-^{13}C]$  Leu 17, Phe 20).

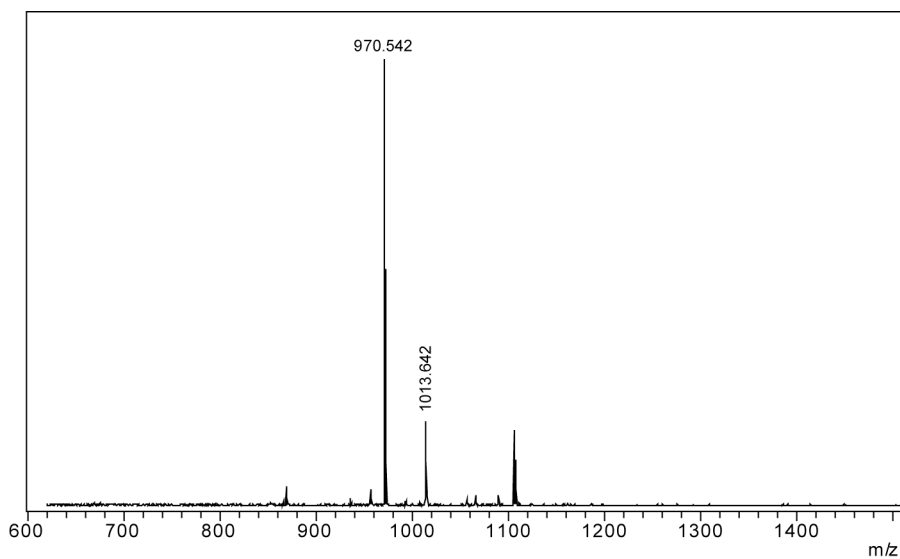

**Figure S37.** MALDI mass spectrum of  $A\beta(16-22)$  Hfl 20 ( $[1-^{13}C]$  Lys 16, Ala 21).

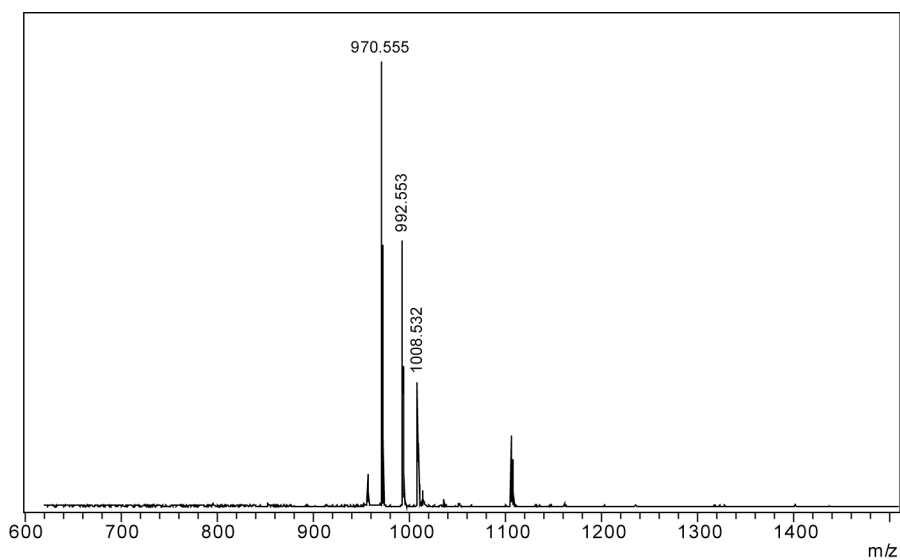

**Figure S38.** MALDI mass spectrum of  $A\beta(16-22)$  Hfl 19,20 ( $[1-^{13}\text{C}]$  Lys 16, Ala 21).

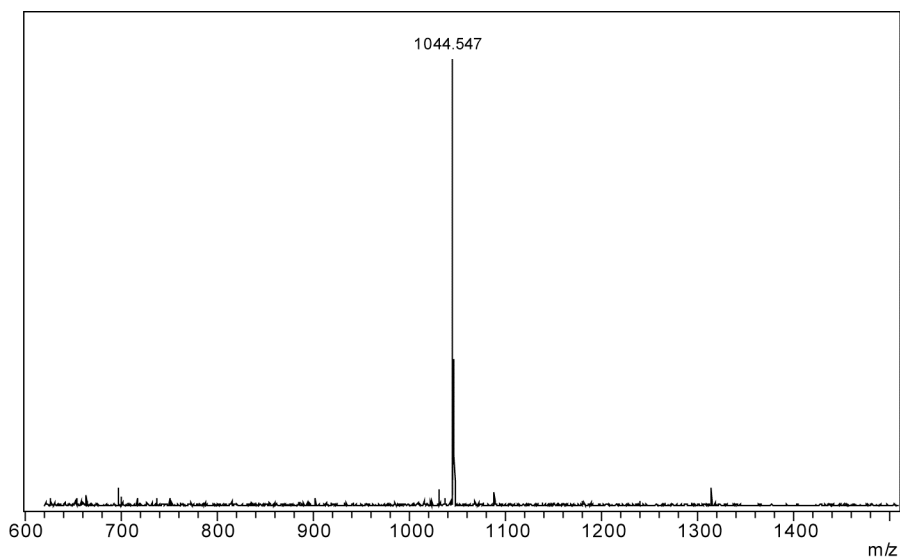

**Figure S39.** ESI mass spectrum of  $A\beta(16-22)$  Ile 19 ( $[1-^{13}\text{C}]$  Leu 17, Ala 21).

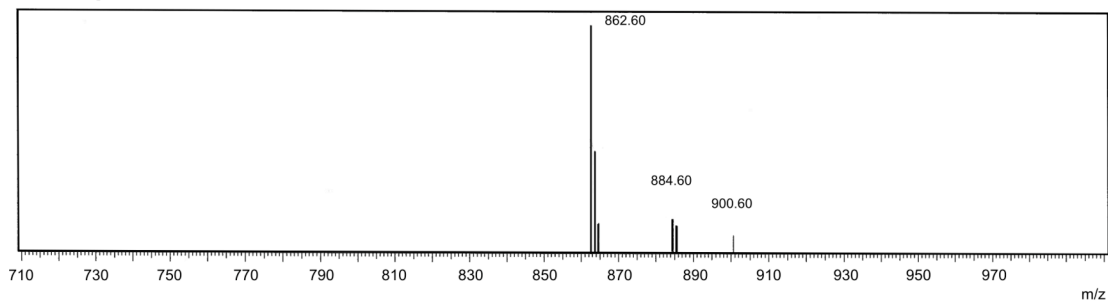

**Figure S40.** ESI mass spectrum of  $A\beta(16-22)$  Ile 19,20 ( $[1-^{13}\text{C}]$  Leu 17, Ala 21).

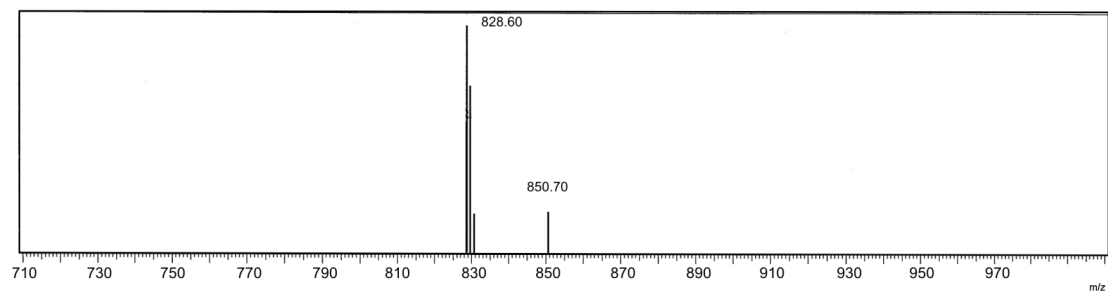

**Table S3.** Calculated and observed  $m/z$  for peptides **1–27**.

| Peptide | Sequence                             | Calculated $m/z$            | Observed $m/z$ |
|---------|--------------------------------------|-----------------------------|----------------|
| 1       | Ac-KLVVFAE-NH <sub>2</sub>           | 846.502 (M <sup>+</sup> H)  | 846.588        |
| 2       | Ac-KLVFVAE-NH <sub>2</sub>           | 846.502 (M <sup>+</sup> H)  | 846.654        |
| 3       | Ac-KLVVVAE-NH <sub>2</sub>           | 798.503 (M <sup>+</sup> H)  | 798.544        |
| 4       | Ac-KLVLFAE-NH <sub>2</sub>           | 860.518 (M <sup>+</sup> H)  | 860.65         |
| 5       | Ac-KLVFLAE-NH <sub>2</sub>           | 860.518 (M <sup>+</sup> H)  | 860.75         |
| 6       | Ac-KLVLLAE-NH <sub>2</sub>           | 826.528 (M <sup>+</sup> H)  | 826.75         |
| 7       | Ac-KLVIFAE-NH <sub>2</sub>           | 860.518 (M <sup>+</sup> H)  | 860.598        |
| 8       | Ac-KLVFIAE-NH <sub>2</sub>           | 860.518 (M <sup>+</sup> H)  | 860.773        |
| 9       | Ac-KLVIIAE-NH <sub>2</sub>           | 826.534 (M <sup>+</sup> H)  | 826.556        |
| 10      | Ac-KLV(Hfl)FAE-NH <sub>2</sub>       | 968.554 (M <sup>+</sup> H)  | 968.50         |
| 11      | Ac-KLVF(Hfl)AE-NH <sub>2</sub>       | 968.554 (M <sup>+</sup> H)  | 968.525        |
| 12      | Ac-KLV(Hfl)(Hfl)AE-NH <sub>2</sub>   | 1042.605 (M <sup>+</sup> H) | 1042.508       |
| 13      | Ac-K*LVV*FAE-NH <sub>2</sub>         | 848.502 (M <sup>+</sup> H)  | 848.560        |
| 14      | Ac-K*LVF*VAE-NH <sub>2</sub>         | 848.502 (M <sup>+</sup> H)  | 848.539        |
| 15      | Ac-K*LVV*VAE-NH <sub>2</sub>         | 800.503 (M <sup>+</sup> H)  | 800.526        |
| 16      | Ac-K*LVL*FAE-NH <sub>2</sub>         | 862.518 (M <sup>+</sup> H)  | 862.539        |
| 17      | Ac-K*LVF*LAE-NH <sub>2</sub>         | 862.518 (M <sup>+</sup> H)  | 862.546        |
| 18      | Ac-K*LVL*LAE-NH <sub>2</sub>         | 828.528 (M <sup>+</sup> H)  | 828.524        |
| 19      | Ac-K*LVI*FAE-NH <sub>2</sub>         | 862.518 (M <sup>+</sup> H)  | 862.559        |
| 20      | Ac-*KLVFI*AE-NH <sub>2</sub>         | 862.518 (M <sup>+</sup> H)  | 862.523        |
| 21      | Ac-*KLVII*AE-NH <sub>2</sub>         | 828.528 (M <sup>+</sup> H)  | 828.517        |
| 22      | Ac-K*LV(Hfl)*FAE-NH <sub>2</sub>     | 970.554 (M <sup>+</sup> H)  | 970.542        |
| 23      | Ac-*KLVF(Hfl)*AE-NH <sub>2</sub>     | 970.554 (M <sup>+</sup> H)  | 970.555        |
| 24      | Ac-*KLV(Hfl)(Hfl)*AE-NH <sub>2</sub> | 1044.605 (M <sup>+</sup> H) | 1044.547       |
| 25      | Ac-K*LVI*FAE-NH <sub>2</sub>         | 862.518 (M <sup>+</sup> H)  | 862.60         |
| 26      | Ac-K*LVII*AE-NH <sub>2</sub>         | 828.528 (M <sup>+</sup> H)  | 828.60         |
| 27      | Ac-K*LV(Hfl)F*AE-NH <sub>2</sub>     | 970.554 (M <sup>+</sup> H)  | 970.65         |

**Figure S41.** HPLC calibration curve of A $\beta$ (16–22) Val 19.

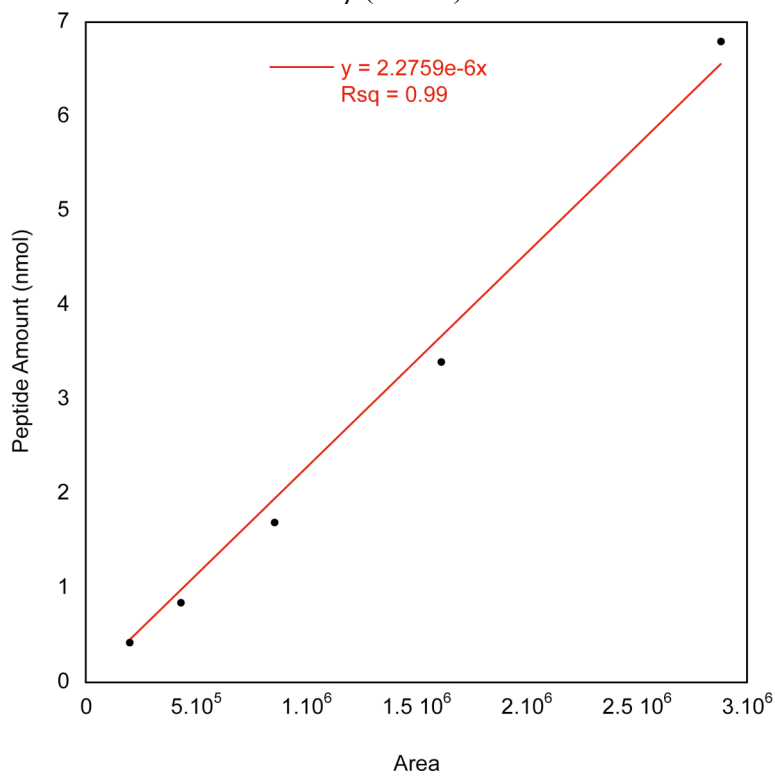

**Figure S42.** HPLC calibration curve of A $\beta$ (16–22) Val 19,20.

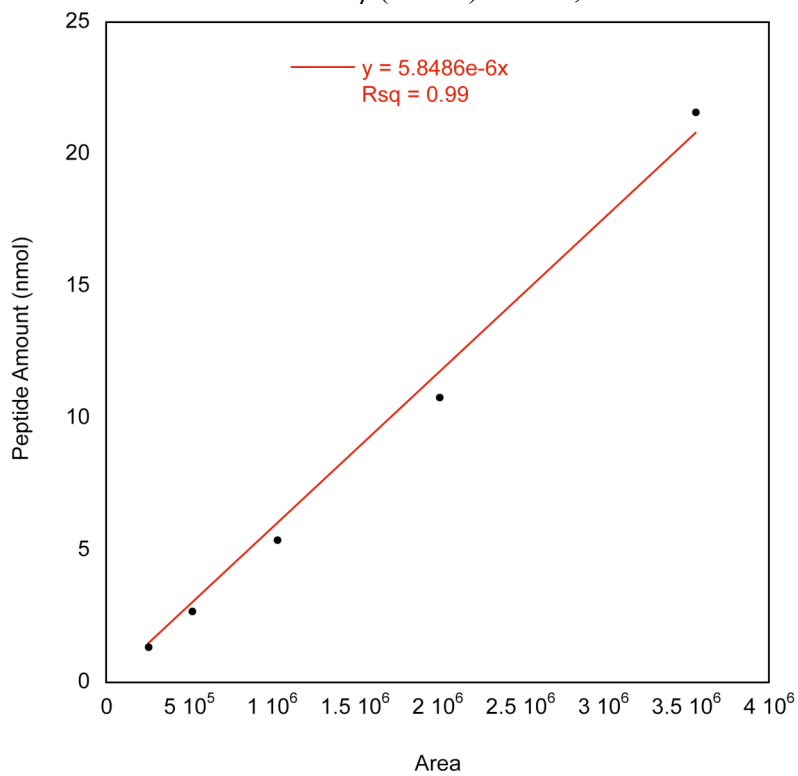

**Figure S43.** HPLC calibration curve of A $\beta$ (16–22) Leu 19.

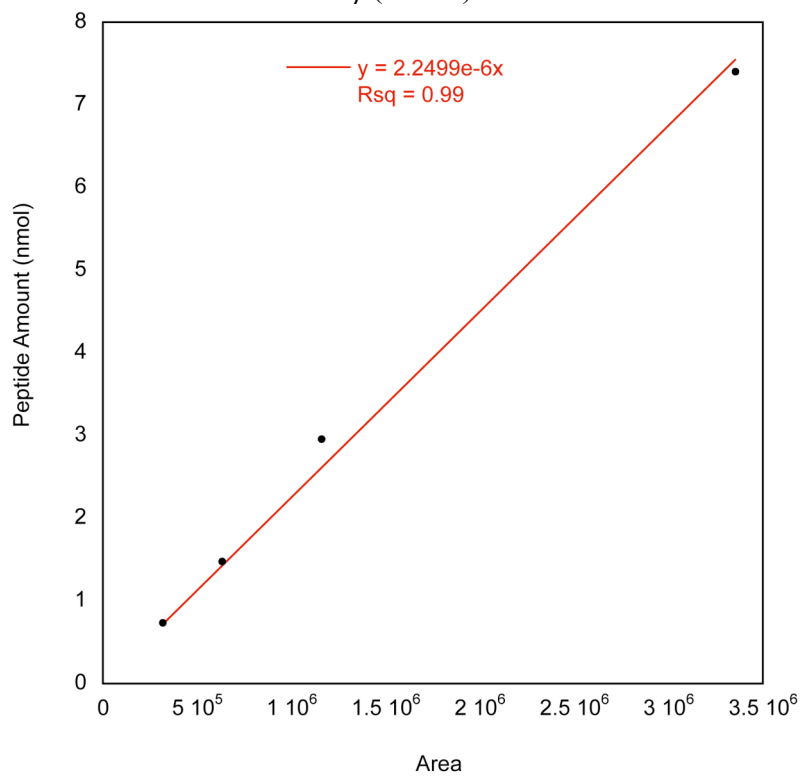

**Figure S44.** HPLC calibration curve of A $\beta$ (16–22) Leu 19,20.

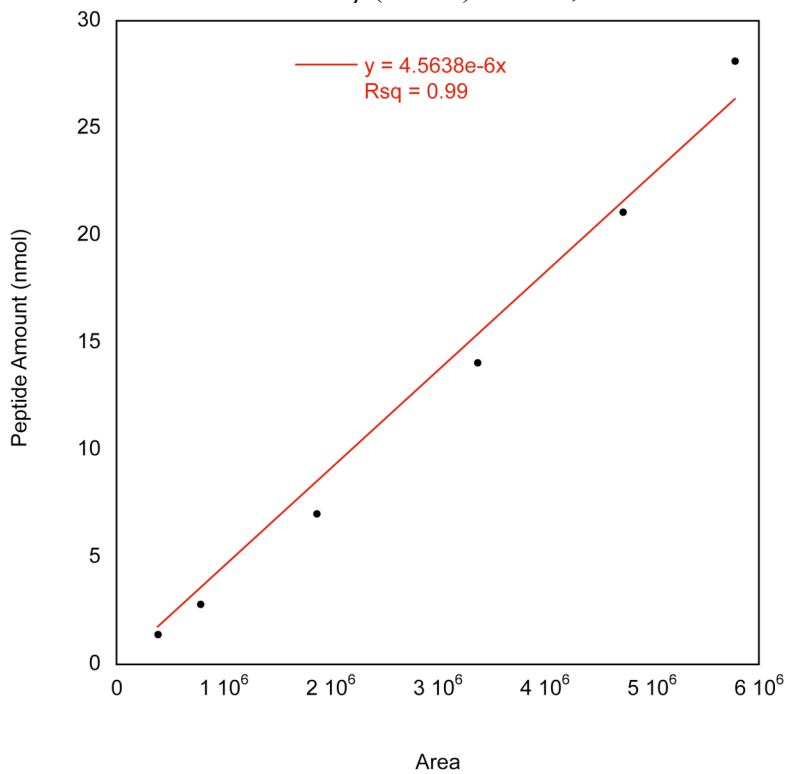



**Figure S45.** HPLC calibration curve of A $\beta$ (16–22) Ile 19.

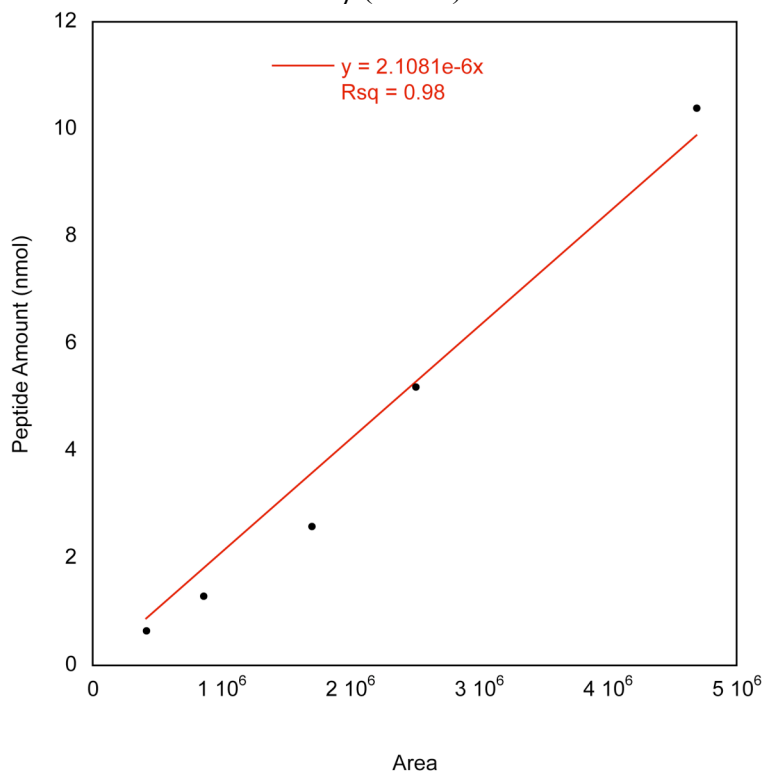

**Figure S46.** HPLC calibration curve of A $\beta$ (16–22) Ile 19,20.

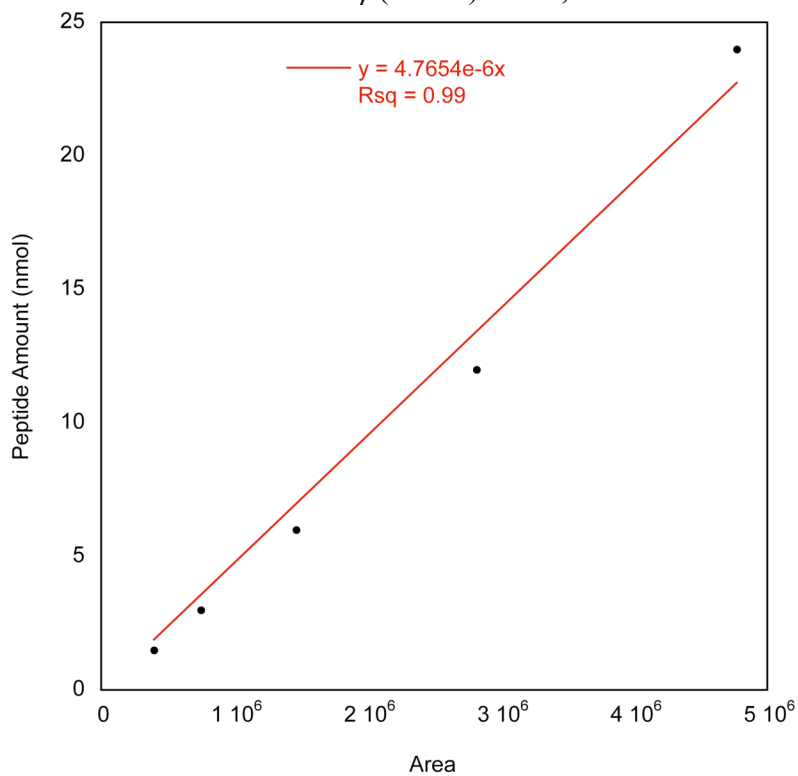

**Figure S47.** HPLC calibration curve of A $\beta$ (16–22) Hfl 19.

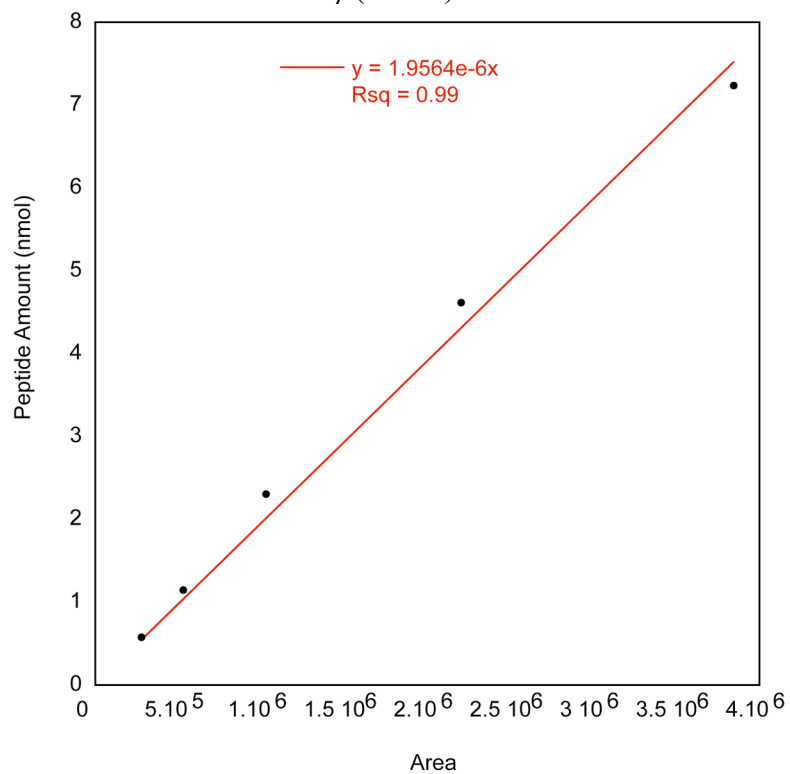

**Figure S48.** HPLC calibration curve of A $\beta$ (16–22) Hfl 19,20.

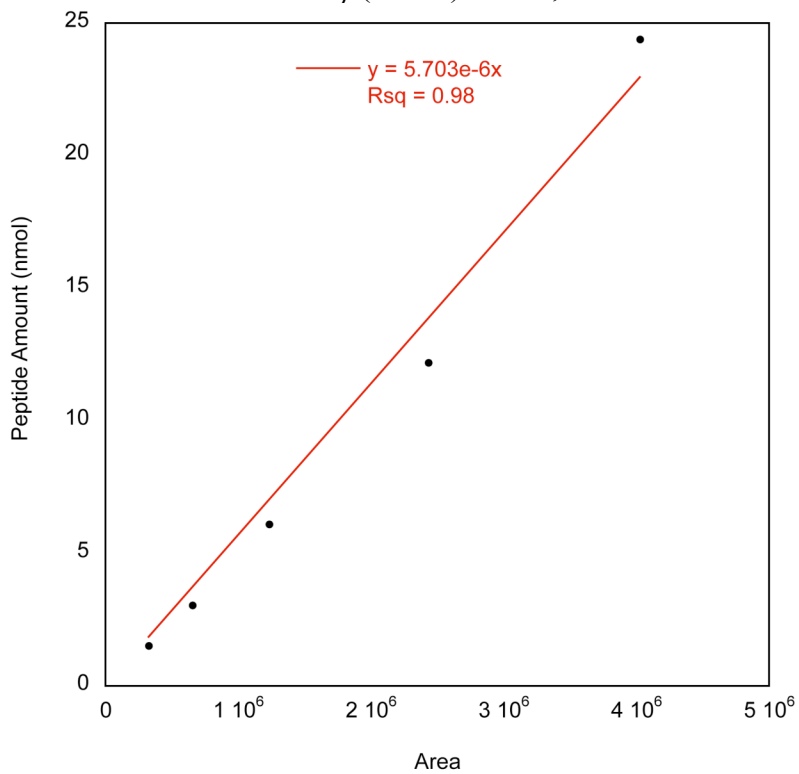

**Figure S49.** Electron diffraction image of  $A\beta(16-22)$  Val 19 fibrils.

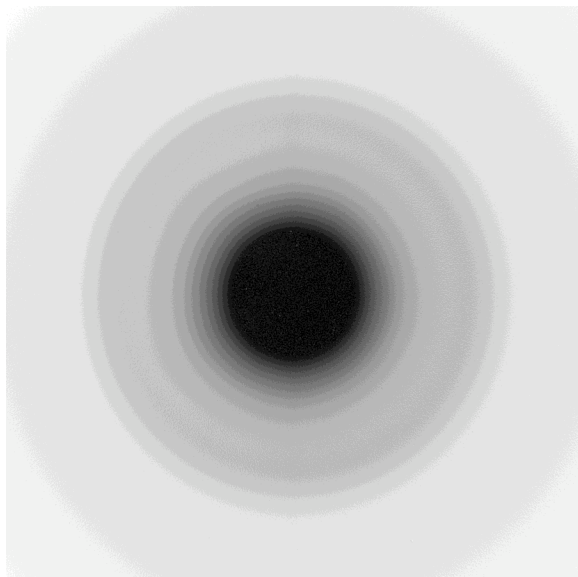

**Figure S50.** Electron diffraction image of  $A\beta(16-22)$  Val 20 fibrils.

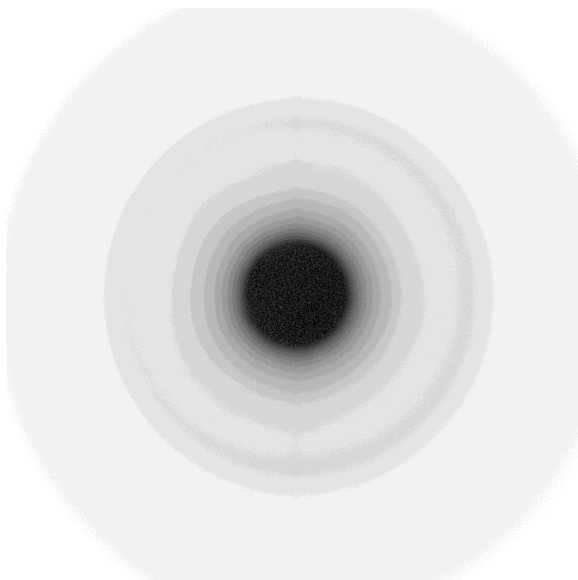

**Figure S51.** Electron diffraction image of  $A\beta(16-22)$  Leu 19 fibrils.

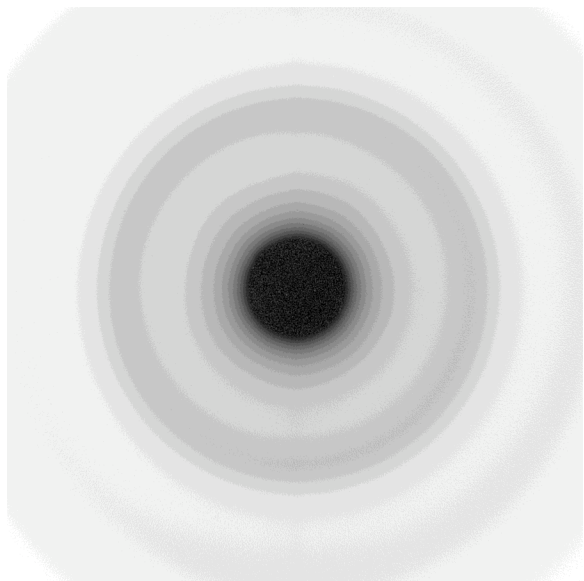

**Figure S52.** Electron diffraction image of  $A\beta(16-22)$  Leu 20 fibrils.

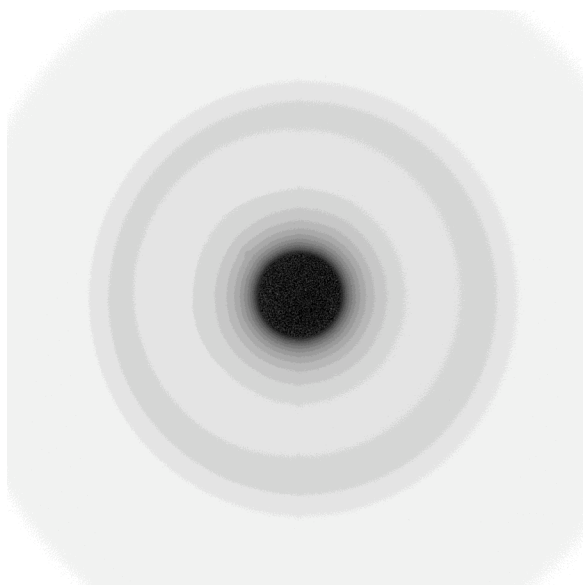

**Figure S53.** Electron diffraction image of  $A\beta(16-22)$  Leu 19,20 fibrils.

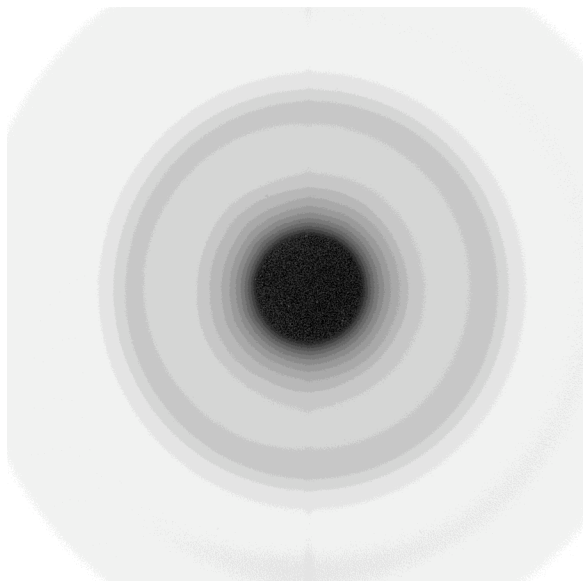

**Figure S54.** Electron diffraction image of  $A\beta(16-22)$  Ile 19 fibrils.

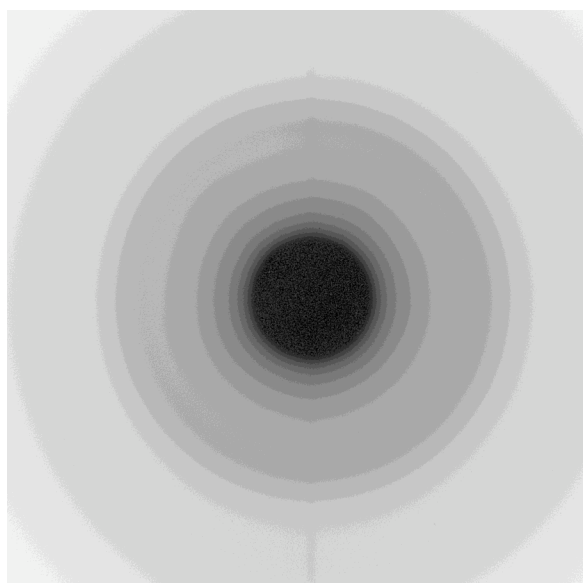

**Figure S55.** Electron diffraction image of  $A\beta(16-22)$  Ile 20 fibrils.

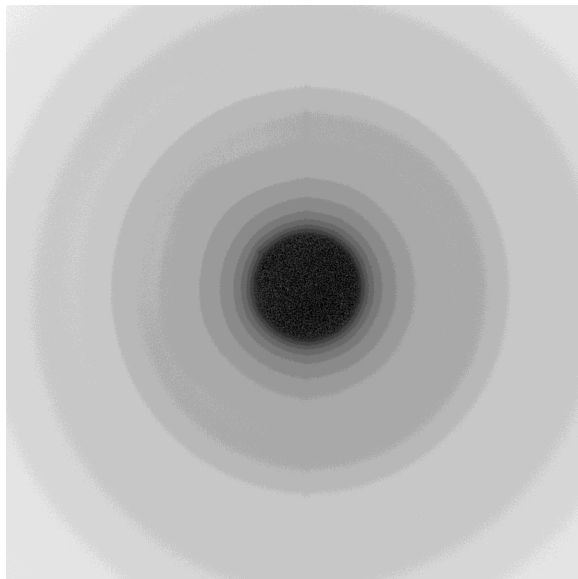

**Figure S56.** Electron diffraction image of  $A\beta(16-22)$  Ile 19,20 fibrils.

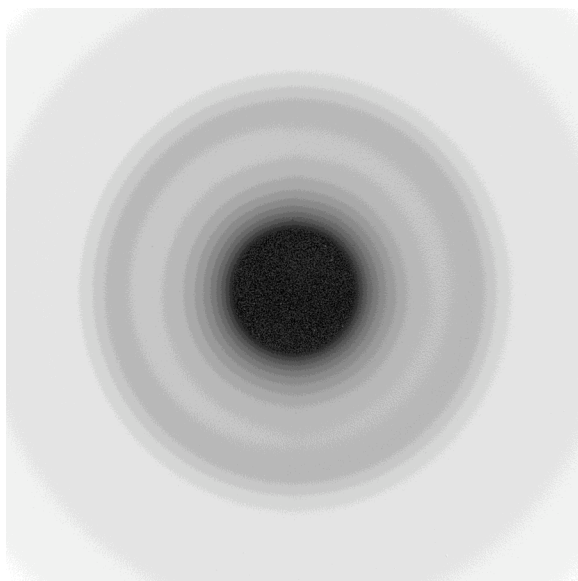

**Figure S57.** Electron diffraction image of  $A\beta(16-22)$  Hfl 19 fibrils.

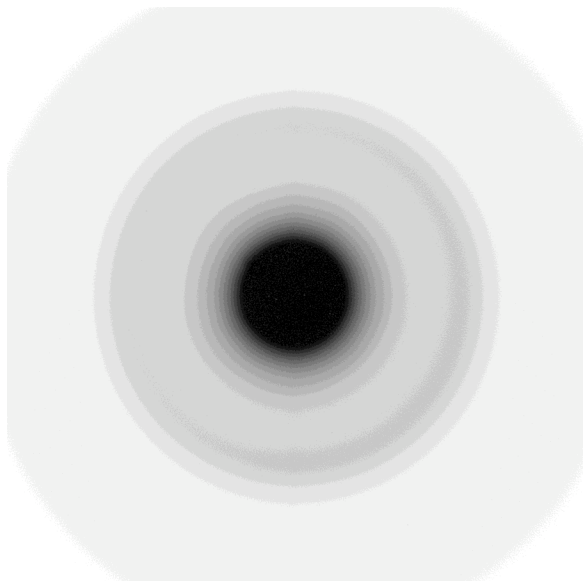

**Figure S58.** Electron diffraction image of  $A\beta(16-22)$  Hfl 20 fibrils.

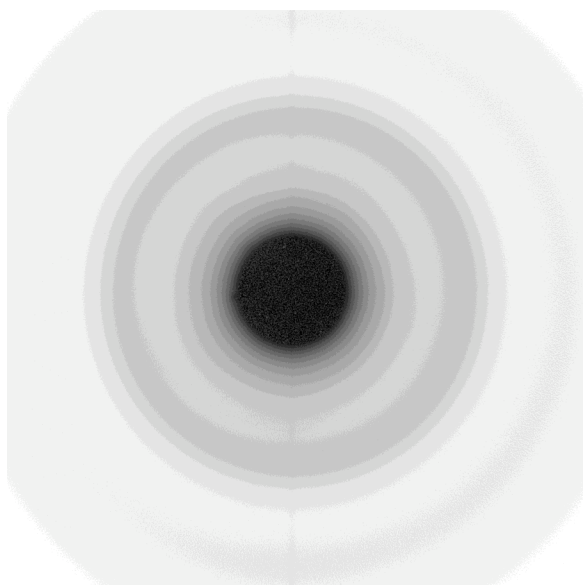

**Figure S59.** Electron diffraction image of  $A\beta(16-22)$  Hfl 19,20 fibrils.

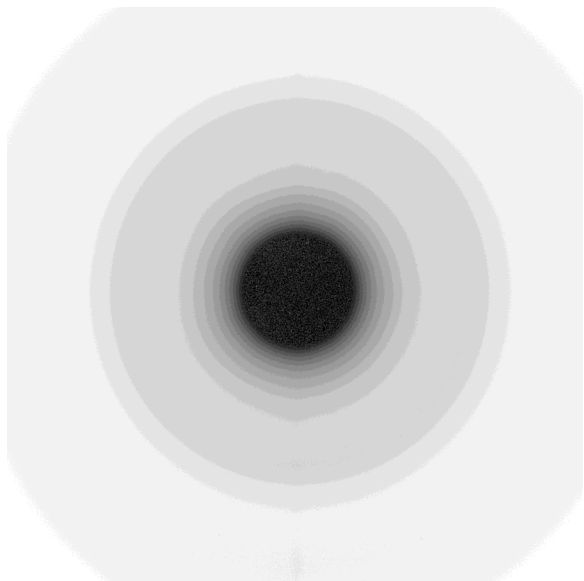



**Table S4.** Observed amide I infrared bands of peptides 1–27.

| Peptide          | Sequence                                        | IR Shifts (cm <sup>-1</sup> ) |
|------------------|-------------------------------------------------|-------------------------------|
| <b>Wild-type</b> | Ac-KLVFFAE-NH <sub>2</sub>                      | 1624, 1691                    |
| <b>1</b>         | Ac-KLVVFAE-NH <sub>2</sub>                      | 1626, 1693                    |
| <b>2</b>         | Ac-KLVFVAE-NH <sub>2</sub>                      | 1629, 1685                    |
| <b>3</b>         | Ac-KLVVVAE-NH <sub>2</sub>                      | N/A                           |
| <b>4</b>         | Ac-KLVLFAE-NH <sub>2</sub>                      | 1626, 1687                    |
| <b>5</b>         | Ac-KLVFLAE-NH <sub>2</sub>                      | 1626, 1688                    |
| <b>6</b>         | Ac-KLVLLAE-NH <sub>2</sub>                      | 1626, 1690                    |
| <b>7</b>         | Ac-KLVIFAE-NH <sub>2</sub>                      | 1629, 1688                    |
| <b>8</b>         | Ac-KLVFIAE-NH <sub>2</sub>                      | 1628, 1688                    |
| <b>9</b>         | Ac-KLVIIAE-NH <sub>2</sub>                      | 1629, 1688                    |
| <b>10</b>        | Ac-KLV(Hfl)FAE-NH <sub>2</sub>                  | 1629, 1686                    |
| <b>11</b>        | Ac-KLVF(Hfl)AE-NH <sub>2</sub>                  | 1628, 1689                    |
| <b>12</b>        | Ac-KLV(Hfl)(Hfl)AE-NH <sub>2</sub>              | 1629, 1691                    |
| <b>13</b>        | Ac-K*L <sup>*</sup> LVV*FAE-NH <sub>2</sub>     | 1599, 1641, 1684              |
| <b>14</b>        | Ac-K*L <sup>*</sup> LVF*VAE-NH <sub>2</sub>     | 1599, 1641, 1684              |
| <b>15</b>        | Ac-K*L <sup>*</sup> LVV*VAE-NH <sub>2</sub>     | N/A                           |
| <b>16</b>        | Ac-K*L <sup>*</sup> LVL*FAE-NH <sub>2</sub>     | 1597, 1643, 1686              |
| <b>17</b>        | Ac-K*L <sup>*</sup> LVF*LAE-NH <sub>2</sub>     | 1597, 1643, 1684              |
| <b>18</b>        | Ac-K*L <sup>*</sup> LVL*LAE-NH <sub>2</sub>     | 1597, 1643, 1684              |
| <b>19</b>        | Ac-K*L <sup>*</sup> LVI*FAE-NH <sub>2</sub>     | 1602, 1634, 1688              |
| <b>20</b>        | Ac-*KLVFI*AE-NH <sub>2</sub>                    | 1597, 1632, 1688              |
| <b>21</b>        | Ac-*KLVII*AE-NH <sub>2</sub>                    | 1601, 1632, 1685              |
| <b>22</b>        | Ac-K*L <sup>*</sup> LV(Hfl)*FAE-NH <sub>2</sub> | 1597, 1645, 1690              |
| <b>23</b>        | Ac-*KLVF(Hfl)*AE-NH <sub>2</sub>                | 1597, 1634, 1683              |
| <b>24</b>        | Ac-*KLV(Hfl)(Hfl)*AE-NH <sub>2</sub>            | 1595, 1632, 1688              |
| <b>25</b>        | Ac-K*L <sup>*</sup> LVIF*AE-NH <sub>2</sub>     | 1606, 1641, 1686              |
| <b>26</b>        | Ac-K*L <sup>*</sup> LVII*AE-NH <sub>2</sub>     | 1606, 1640, 1688              |
| <b>27</b>        | Ac-K*L <sup>*</sup> LV(Hfl)F*AE-NH <sub>2</sub> | 1606, 1643, 1689              |

\* Indicates [1-<sup>13</sup>C]-labeled amino acid.

**Figure S60.** Isotope-edited IR spectra for fibrils derived from the Ile 19 and Ile 19,20 variants (Leu 17/Ala 21 [ $1\text{-}^{13}\text{C}$ ]-labeled) and the Hfl 19 variant (Leu 17/Ala 21 [ $1\text{-}^{13}\text{C}$ ]-labeled). All spectra are consistent with an uncoupled relationship between the labeled amino acids.

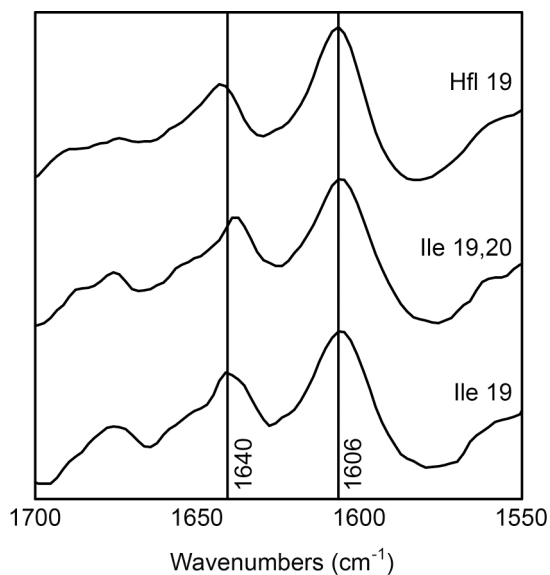

Supplement: c0mb00210k.pdf [file c0mb00210k.pdf]
